# Supplementary material
Source: PubMed Central journal article supplement (PMC3896156)
Supplement: 1321597111_sapp.pdf [file 1321597111_sapp.pdf]

# 1 **Supplementary Information**

2 Schlaeppli et al. , PNAS

## 4 **Experimental design**

5 We have investigated the root-inhabiting bacterial microbiota of *Arabidopsis thaliana* (L.)  
6 Heynh and the relative species *Arabidopsis lyrata* (L.) O’Kane & Al-Shehbaz, *Arabidopsis*  
7 *halleri* (L.) O’Kane & Al-Shehbaz and *Cardamine hirsuta* (L.). We performed two samplings  
8 at natural sites and conducted two replicate greenhouse experiments. The Table 1 provides an  
9 overview of replicate samples per sample type, plant species and experiments and the Dataset  
10 S1 provides a detailed experimental design with individual sample IDs and the sequencing  
11 effort.

### 13 **Natural site experiments:**

14 At the two sites ‘Cologne’ (50.982222034039 N/ 6.82718753814697 E, Widdersdorf,  
15 Germany) and ‘Eifel’ (50.45012819440579 N/ 6.936978399753571 E, Dümpelfeld,  
16 Germany) we have collected side by side naturally growing (i.e. not planted by the authors) *A.*  
17 *thaliana* and *C. hirsuta* in spring 2012. We have excavated whole plants including the  
18 surrounding soil in cores of ~5 cm in diameter and 5 - 10 cm in depth. The plants in their soil  
19 cores were brought to the laboratory and the root systems were sampled within 12 h after  
20 removing the plants from their natural habitat. From each species a minimum of 25  
21 individuals were collected, of which 20 were pooled into 4 samples, each consisting of 5  
22 plants. From these 4 samples per species the rhizosphere and the root compartments were  
23 fractionated (see below) and used for community profiling. The remaining 5 plants (per  
24 species and site) were re-potted and grown in the greenhouse to produce seeds in order to  
25 collect the genetic material from the natural sites. The soil collected from the sites was used to  
26 obtain 4 samples for community profiling and analyzed for physical and chemical properties  
27 at the ‘Labor für Boden- und Umweltanalytik’ (Eric Schweizer AG, Thun, Switzerland, Table  
28 S1).

### 30 **Greenhouse experiments:**

31 Seeds of *A. thaliana* ecotypes (Shakdara (Sha), Landsberg (Ler) and Columbia (Col,  
32 CS22625)) were received from Prof. Maarten Koornneef, Department of Plant Breeding and  
33 Genetics, Max Planck Institute for Plant Breeding Research, Cologne, Germany. Col was  
34 chosen as it is the most widely used ecotype of the model plant *A. thaliana* and compared

35 with Ler and Sha for cross validation with our previous study (3). Dr. Pierre Saumitou-  
36 Laprade (Laboratoire de Génétique et Evolution des Populations Végétales, FRE CNRS 3268,  
37 Université de Lille, Villeneuve d'Ascq, France) kindly provided seeds of *A. halleri* (Auby),  
38 which he collected in summer 2009 at a heavy metal contaminated site nearby the town of  
39 Auby, France (1, 2). The line Mn47 of *A. lyrata* was obtained from the Nottingham  
40 Arabidopsis Stock Center (Stock ID N960898) and *C. hirsuta* (Oxford) was a kind gift of  
41 Prof. Milos Tsiantis (Department of Comparative Development and Genetics, Max Planck  
42 Institute for Plant Breeding Research, Cologne, Germany). In replicate greenhouse  
43 experiments we grew the three *A. thaliana* ecotypes together with the relative species *A.*  
44 *halleri*, *A. lyrata* and *C. hirsuta* in pots containing natural, microbe-rich soil. The natural  
45 experimental 'Cologne soil' (CS) was collected at the Max Planck Institute for Plant Breeding  
46 Research (50.958 N/ 6.856 E, Cologne, Germany) in March and in September 2010, stored  
47 and prepared for use as previously described (3). The spring soil batch 'CS-4' and fall batch  
48 'CS-5' were used in the first and in the second greenhouse experiments, respectively. The  
49 geochemical characterization, as obtained from the 'Labor für Boden- und Umweltanalytik'  
50 (Eric Schweizer AG, Thun, Switzerland) is provided in Table S1.

51 Before planting, seeds were surface-sterilized recycling spin columns from the Qiaquick gel  
52 extraction kit (Qiagen, Hilden, Germany), of which the silica membrane was removed. Seeds  
53 were incubated in 700 µl ethanol (70%) on a laboratory shaker in the closed spin columns and  
54 after 20 min the alcohol was removed and the seeds washed with a „flow-through“ of 700 µl  
55 ethanol (100%) through the column. Following a short spin centrifugation step the seeds were  
56 dried in open spin columns for 30 minutes in a laminar flow hood. Spin columns were closed  
57 and seeds kept sterile until sowing. Surface sterilized seeds were sown onto 7x7x9 cm (LWH)  
58 plastic pots filled with experimental soil, which were placed at 4°C in the dark for  
59 stratification during 5 days prior to translocation to the greenhouse. We grew the plants for six  
60 weeks under short day conditions 8 hours light (day) and 16 hours dark (night), 22°C during  
61 the day and 18°C during the night at a relative humidity of 70 %. After germination, surplus  
62 seedlings were removed to grow the plants at a density of 4 plants per pot. Unplanted pots  
63 were subjected to the same conditions as the planted pots to prepare the control soil samples  
64 at harvest. We harvested the root systems after six weeks, when all plant species and  
65 genotypes were at the vegetative growth stage of the rosette. For all plant species and  
66 genotypes we prepared triplicate root samples (see below) for pyrosequencing each consisting  
67 of 12 plants originating from 3 pots. For comparison we prepared also 3 soil samples from 3  
68 unplanted pots.

## 69 **Sample preparation**

70 Roots were separated from the adhering soil particles and the defined root segment of 3 cm  
71 length starting 0.5 cm below the root base was harvested. Roots were collected in 15 ml  
72 falcons containing 3 ml PBS-S buffer (130 mM NaCl, 7 mM Na<sub>2</sub>HPO<sub>4</sub>, 3 mM NaH<sub>2</sub>PO<sub>4</sub>, pH  
73 7.0, 0.02 % Silwet L-77) and washed for 20 minutes at 180 rpm on a shaking platform. The  
74 roots were transferred to a new falcon tube and the soil suspension was centrifuged for 20  
75 minutes at 4,000 x g and the pellet, referred to as the rhizosphere, collected in liquid nitrogen  
76 and stored at -80°C. After washing a second time (20 minutes at 180 rpm in 3 ml PBS-S  
77 buffer) the roots were transferred to a new falcon tube and sonicated for 10 minutes at 160 W  
78 in 10 intervals of 30 seconds pulse and 30 seconds pause (Bioruptor Next Gen UCD-300,  
79 diagenode, Liège, Belgium) to enrich for bacteria with root endophytic lifestyle. Roots were  
80 removed from PBS-S, dipped in a fresh volume of 3 ml PBS-S buffer and shortly dried on 50  
81 mm diameter whatman filter paper (GE Healthcare USA), transferred to 2 ml tubes and frozen  
82 in liquid nitrogen for storage at -80°C. Soil samples were collected from unplanted pots in a  
83 soil depth of -0.5 to -3.5 from the surface corresponding to 3 cm root length, frozen in liquid  
84 nitrogen and stored at -80°C until further processing.

85 DNA was extracted with the FastDNA® SPIN Kit for Soil (MP Biomedicals, Solon, USA)  
86 following the manufacturer's instructions with minor modifications. Samples were  
87 homogenized in the Lysis Matrix E tubes using the Precellys®24 tissue lyzer (Bertin  
88 Technologies, Montigny-le-Bretonneux, France) at 6,200 rotations per second for 30 seconds.  
89 Frozen samples were homogenized 2 times without buffer and in between cooled in liquid  
90 nitrogen. Samples were homogenized a third time after the addition of the sodium phosphate  
91 and MT buffers provided by the kit. DNA samples were eluted in 100 µl DES water and DNA  
92 concentrations were determined using the Quant-iT™ PicoGreen® dsDNA Assay Kit  
93 (Invitrogen, life technologies) on an iQ™5 real-time PCR instrument (Bio-Rad Laboratories,  
94 Hercules, USA). Briefly, fluorescence was measured (at 25°C, 30'' conditioning followed by  
95 3 cycles of 30'' for quantification) in 96 well plates filled with 40 µl of a 1:200 dilution of  
96 PicoGreen that was added to 4 µl of DNA sample or samples of a 5x dilution series (50 to 0.5  
97 ng/µl) of lambda DNA (in the same plate). Based on the mean fluorescence of the 3 cycles,  
98 the DNA concentrations were calculated from the generated standard curve and adjusted to a  
99 final concentration of 3.5 ng/µl.

100 Amplicon libraries were generated using the PCR primers 799F  
101 (AACMGGATTAGATACCKG, reference 14) and 1193R (5'-  
102 ACGTCATCCCCACCTTCC-3', reference 3) spanning ~400 bp of the hypervariable region

103 V5-V7 of the bacterial 16S rRNA gene. For multiplexed pyrosequencing we utilized the 799F  
104 primer fused at the 5' end with a sample specific (see Dataset S1), error-tolerant 6-mer  
105 barcode (N's) followed by a *Sfi*I restriction site containing sequence required for the ligation  
106 of the 454 adaptor A (see below; 5'-GATGGCCATTACGGCC-NNNNNN-799F-3'). The  
107 1193R primer was extended at the 5' end to contain the target sequence of 454's sequencing  
108 primers (5'-CCTATCCCCTGTGTGCCTTGGCAGTCGACT-1193R-3').

109 PCRs were performed on an PTC-225 Tetrad DNA Engine (MJ Research, USA) with the  
110 DFS (DNA Free Sensitive) Taq DNA Polymerase system (Bioron, Ludwigshafen, Germany)  
111 using 3 µl of 3.5 ng/µl adjusted template DNA in a total volume of 25 µl. PCR components in  
112 final concentrations included 1 U DFS-Taq DNA Polymerase, 1x incomplete reaction buffer,  
113 0.3% BSA (Sigma-Aldrich, St. Louis, USA), 2 mM of MgCl<sub>2</sub>, 200 µM of dNTPs and 300 nM  
114 of each fusion primer. The PCR reactions were assembled in a laminar flow and amplified  
115 using the touch-down protocol in Table S2. To minimize stochastic PCR effects samples were  
116 amplified with 4 independently pipetted mastermixes in triplicate reactions per mastermix.  
117 Triplicate reactions of each sample were pooled per mastermix and a 5 µl aliquot inspected on  
118 a 1% agarose gel for the lack of PCR amplicons in non-template control reactions.  
119 Subsequently, pools of the replicate master mixes were sample-wise combined and cleaned  
120 from PCR ingredients using the QIAquick PCR Clean Up kit (Qiagen, Hilden, Germany),  
121 eluted in 30 µl of 10 mM Tris-HCl (pH 7.5) and loaded on a 1.5% agarose gel. The PCR  
122 primers 799F and 1193R produce a mitochondrial product at ~800 bp and a bacterial  
123 amplicon at ~450 bp, which we cut from the gel with the x-tracta Gel Extraction Tool (Sigma-  
124 Aldrich, St. Louis, USA) and extracted from the agarose using the QIAquick Gel Extraction  
125 kit (Qiagen, Hilden, Germany). Following purification and elution in 10 mM Tris-HCl (pH  
126 7.5) we determined the concentration of the amplicon DNA in each sample using the  
127 PicoGreen assay described above. Finally we utilized 200 ng per barcoded DNA sample to  
128 build an amplicon library that was purified twice with the Agencourt AMPure XP PCR  
129 Purification system (1:1 ratio library/AMPure beads) to remove traces of PCR primers and  
130 primer dimers and thereby concentrating the final volume to 200 µl and further to 70 µl (in 10  
131 mM Tris-HCl, pH 7.5). We prepared separate amplicon libraries for each natural site and each  
132 greenhouse experiments and we also prepared a combined library with a subset of samples  
133 from both greenhouse replicates (see Dataset S1).

134 Amplicon libraries containing a *Sfi*I restriction enzyme site at the 5' end were prepared for  
135 ligation of the 454 adaptor A by digestion for 1 h at 50°C with *Sfi*I (NEB, Frankfurt,  
136 Germany) and afterwards purified with the MinElute PCR Purification Kit (Qiagen, Hilden,

137 Germany). The 454 adaptor A with its compatible 3'-*Sfi*I-overhang was ligated to the  
138 amplicons overnight at 16°C with 1 U T4 DNA ligase (Roche, Mannheim, Germany)  
139 followed by heat inactivation (10 min at 65°C). 454 compatible amplicon libraries were  
140 purified from unligated adapters after size fractionation on 2% agarose gels with the Qiaquick  
141 gel extraction kit (Qiagen, Hilden, Germany). Amplicon libraries were bound to beads and  
142 clonally amplified using the GS FLX Titanium LV emPCR Kit (Lib-L). The amplicon  
143 libraries were then sequenced using the GS FLX Titanium Sequencing Kit XLR70 and GS  
144 FLX Titanium PicoTiterPlate Kit. All kits used were purchased from Roche and used  
145 according to the manufacturers' protocol. Sequencing was performed at the Max Planck  
146 Genome Center in Cologne (<http://mpgc.mpipz.mpg.de/home/>).

147

#### 148 **Sequence analysis using QIIME**

149 Pyrosequencing reads were processed and analyzed using QIIME (4, version 1.7.0). Using the  
150 script *split\_libraries.py* we splitted the reads of each of the libraries according to their  
151 assigned barcodes to the individual samples (Dataset S1). Reads with erroneous barcode or  
152 forward primer sequences or with ambiguous base calls were discarded. We defined quality  
153 sequences to require a minimal Phred score of 27 and to be at least 315 bp long. With the  
154 same script we truncated the reads to remove the reverse primer and any subsequent sequence  
155 at the 3' end. We then concatenated all quality sequences that were indexed by samples and  
156 libraries into a single fasta file, which we used as input for *pick\_otus.py*. Using *uclust* (5) we  
157 clustered the quality sequences at 97 % sequence similarity defining the operational  
158 taxonomic units (OTUs). Chimeric OTUs/sequences were identified by ChimeraSlayer (6)  
159 using default settings and removed from the analysis. The most abundant sequence in an OTU  
160 cluster was selected as OTU representative sequence, taxonomically assigned with  
161 Greengenes (7; release *gg\_otus\_13\_05*, confidence cutoff 0.5) and bound in an OTU table  
162 with *make\_otu\_table.py*. We subsequently identified plant-sequence-derived OTUs with a  
163 custom *R* script and removed these from the OTU table with the script  
164 *filter\_otus\_from\_otu\_table.py*. The resulting OTU table (Dataset S8) contained the quality  
165 sequences of all samples of the Cologne (L388) and Eifel (L39) site, Greenhouse replicate 1  
166 (L28) and replicate 2 (L35) experiments as well as the common library (L40). The L40  
167 samples, utilized to examine biological vs. technical variation (see below), were removed for  
168 downstream analyses with the script *filter\_samples\_from\_otu\_table.py*. For the phylogeny  
169 related analyses we build a tree based on PyNAST-aligned (8) and filtered set of

170 representative sequences. The script *multiple\_rarefactions.py* with the OTU table (Dataset S8)  
171 as input was used to prepare the rarefied OTU tables (100x tables from 1,000 - 6,000  
172 sequences per sample, steps of 1000 sequences), which were used for alpha diversity analyses  
173 (*alpha\_diversity.py* with metrics *observed\_species* and *PD\_whole\_tree*). The alpha diversity  
174 data was imported into R (R Development Core Team, <http://www.R-project.org>) to plot Fig.  
175 S7. We randomly chose the data file #31 (Dataset S4) of the rarefied OTU tables (sampling  
176 depth of 6,000 sequences per sample) for the downstream OTU-based and beta diversity  
177 analyses. We refer to this data matrix as the threshold-independent community (TIC) for  
178 which the taxonomic overview is presented in Fig. S4B. We estimated beta diversity by  
179 calculating weighted UniFrac distances with the script *beta\_diversity.py* and imported the  
180 distance matrix into R to generate the Fig. S5.

181

## 182 **Technical reproducibility of community profiles**

183 We determined the technical reproducibility of 16S rRNA gene amplicon libraries by  
184 pyrosequencing Library L28 (greenhouse replicate #1) from parallel emulsion PCRs  
185 (emPCR). The reaction products of the replicate emPCRs were sequenced on separate regions  
186 of the same 454 pico titer plate resulting in 368,675 and 416,352 raw reads from regions 1 and  
187 2, respectively. For this analysis we performed a second QIIME run with data from the L28  
188 samples only but split by region, whereas the sequences of the L28 samples from both regions  
189 had been combined for the main QIIME analysis (see above). We utilized the same QIIME  
190 pipeline as described above to generate an OTU table based on co-clustered quality sequences  
191 (Dataset S2). In R using the package *Vegan* (9), we corrected for differences in sequencing  
192 depths by rarefaction to 6,000 sequences per sample. Fig. S1A displays of the 3 *A. thaliana*  
193 (ecotype Col), 3 *C. hirsuta* and the 3 soil samples the pairwise variation in OTU abundance  
194 from the parallel sequencing results. To define the minimal number of sequences per OTU  
195 required for the reproducible quantification of OTU abundance, we progressively removed  
196 low abundant OTUs from the data matrix. We tested Spearman rank correlation of bacterial  
197 profiles between corresponding samples in datasets where individual OTUs were represented  
198 by a minimum of 1, 2, 3 or up to 40 sequences in one of the two samples (Fig. S1B).

199

200

201 **Rarefaction analysis (Fig. S2)**

202 Combining of sequences from both pico titer plate regions of the first greenhouse replicate  
203 experiment (Library L28) resulted in sequencing depths of 17,441 – 58,150 quality sequences  
204 per sample (Dataset S1) and permitted rarefaction analysis at augmented sequencing depth  
205 (see below, Fig. S2). Based on the non-rarefied dataset (Dataset S8) derived from the main  
206 QIIME analysis (see above), we estimated rarefaction curves for each sample individually  
207 using the function *calculateRarefaction* of the R package ShotgunFunctionalizeR (10).  
208 Similarly, we performed rarefaction analysis on the ACM dataset (see below).

209

210 **Defining the Abundant Community Members (ACMs)**

211 Based on the TIC datafile (Dataset S4) we prepared the abundant community members  
212 (ACMs) data matrix (Dataset S3) by removing OTUs, which did not reach the minimum of 20  
213 quality sequences in at least one of the 77 samples of the natural site and greenhouse  
214 experiments. We normalized the counts of individual ACM OTUs in a sample by dividing the  
215 total counts of all ACM OTUs within that sample followed by a multiplication by 1,000  
216 resulting in relative abundance (RA) expressed as per mill. Statistical comparisons were  
217 conducted on log<sub>2</sub>-transformed ( $\log_2(\text{RA}+1)$ ) per mill values. Fig. S3 reports the number of  
218 quality sequences per sample in the ACM data matrix and the Fig. S4A displays the  
219 taxonomic composition of the ACM.

220 Alpha and beta diversity analyses for the ACM were performed in QIIME using the same  
221 functions and parameters as for the TIC analyses described above. To this end, the OTU-IDs  
222 of the ACM that were determined in R were used in QIIME to subset the TIC datafile  
223 (Dataset S4) to the ACM data matrix (Dataset S3). The ACM data matrix was used for  
224 multiple rarefactions (100x tables from 500 - 6,000 sequences per sample, steps of 500  
225 sequences) to prepare the rarefied ACM containing OTU tables, which were subsequently  
226 employed for the ACM alpha diversity analyses and this data was also imported into R to  
227 generate the Fig. S7. The ACM beta diversity estimates are based on 1,400 sequences per  
228 sample (see Fig. S3) and distance matrix was imported into R to generate the Fig. 2.

229

230

## 231 **Technical reproducibility of library sequencing**

232 The greenhouse experiments were conducted with the two seasonal soil batches ‘spring CS-4’  
233 and ‘fall CS-5’ in the first and in the second experiments, respectively. Since we noted that  
234 the environmental conditions (soil types at the natural sites and the soil batches under the  
235 controlled conditions) were the major sources of variation in ACM community composition  
236 (Fig. 2 and Fig. S5), we examined if this could arise from independent library preparation and  
237 sequencing. We therefore prepared the additional common sequencing library (L40)  
238 containing bacterial amplicons of the 3 *A. thaliana* root (ecotype Col) and 3 soil samples of  
239 each replicate greenhouse experiment. The PCR reactions with these 12 samples were  
240 conducted in parallel and we generated 531 – 1,225 quality sequences per sample for this  
241 control library (Dataset S1). To analyze the community profiles of the common sequencing  
242 library L40 with the original sequences of the samples from the libraries L28 and L35 we  
243 subsetted the non-rarefied OTU table (Dataset S8) for these 3 root and 3 soil samples of each  
244 library with the script *filter\_samples\_from\_otu\_table.py*. We corrected for differences in  
245 sequencing depths by rarefaction to 530 sequences per sample (Dataset S5) and calculated the  
246 weighted UniFrac distances using QIIME. Subsequently, the data was imported into R to  
247 prepare the Fig. S6.

248

## 249 **Statistical analysis using ANOVA**

250 We implemented ANOVA-based statistics to identify taxonomic groups of OTUs  
251 (‘community modules’) and individual OTUs (‘community members’) that differ  
252 quantitatively between samples (root vs. soil communities; among root communities of  
253 different plant species). For community module analyses we prepared abundance matrices  
254 both at phylum and family rank containing sample-wise the sum of OTU abundances of all  
255 OTUs in the ACM per given taxon. For example, the abundance of the phylum Bacteroidetes  
256 resulted from the summed abundances of all OTUs in the ACM assigned to this phylum. The  
257 data matrices at phylum and family rank comprised 9 and 51 taxa, respectively. For individual  
258 community member statistics, we investigated the 237 OTUs of the ACM. All statistical  
259 comparisons were performed with custom scripts in R on log<sub>2</sub>-transformed values (see  
260 above). For the analysis of both, natural site and greenhouse experiments, we used two  
261 models: one for comparisons of root, soil and rhizosphere samples with one factor depicting



262 the sample groups, and the other for comparisons among root samples with all factors and  
263 their interactions. The models are described below and given in the supplementary Dataset S6.

#### 264 *Natural site experiments*

265 We first searched for differentially abundant ‘community modules’ among the root samples of  
266 both sites as a function of the variables *site* and *host species*. The abundance of each  
267 community module was modeled for the variables *site* (levels: Eifel and Cologne) and *host*  
268 *species* (levels: *A. thaliana*, *C. hirsuta*): ANOVA(Abundance\_of\_taxon ~ *site* \* *host species*,  
269 data=root\_samples\_both\_sites). We corrected the *P* values of these F-tests for both variables  
270 and their interaction (*site:species*) for the number of tests performed using the Benjamini and  
271 Hochberg (BH) method (11). The ANOVA statistic results are presented in the Dataset S6  
272 worksheet A. We subsequently conducted pair-wise comparisons between the sample groups  
273 of the *site:species* interaction using Tukey’s HSD (honestly significant difference) post-hoc  
274 test. Sample groups included the *A. thaliana* and *C. hirsuta* root samples of the Cologne and  
275 Eifel sites: A.t.Cologne, C.h.Cologne, A.t.Eifel and C.h.Eifel. Of the Tukey results we  
276 extracted for each taxon the adjusted *P* values (Tukey corrects for multiple hypothesis testing  
277 resulting from the pair-wise comparisons between the sample groups) and we further  
278 corrected the Tukey’s *P* values for the number of taxa tested using the BH method. The Tukey  
279 statistic table of this analysis is presented in Dataset S6 worksheet B. From the comparison  
280 terms ‘A.t.Cologne-C.h.Cologne’ and ‘A.t.Eifel-C.h.Eifel’ we deduced the species-specific  
281 community modules of each site as reported in Fig. S8.

282 Secondly, we examined the bacterial communities at the level of individual members (OTUs)  
283 in the soil, root and rhizosphere samples. We determined for both sites separately the OTUs  
284 that are enriched in the roots of each species compared to the corresponding soil community  
285 (designated ‘RootOTUs’). Analogous, we identified the OTUs that are more abundant in the  
286 rhizosphere of a species compared to the corresponding soil (termed ‘RhizoOTUs’). To this  
287 end the abundance of each OTU of the ACM was modeled as a function of the ‘sample  
288 groups’ present in the experimental design of each natural site experiment:  
289 TukeyHSD(ANOVA(Abundance\_of\_OTU ~ *sample\_group*, data=by\_site)). Sample groups  
290 comprised soil, rhizosphere samples of *A. thaliana* (A.t.Rhizosphere), root samples of *A.*  
291 *thaliana* (A.t.Root), rhizosphere samples of *C. hirsuta* (C.h.Rhizosphere) and root samples of  
292 *C. hirsuta* (C.h.Root). We conducted pair-wise comparisons between the *sample groups* using  
293 the Tukey method described above. For each OTU we extracted the Tukey adjusted *P* values  
294 and further corrected these for the number of OTUs tested using the BH method (Dataset S6

295 worksheets C and D). From the comparison terms ‘A.t.Rhizosphere-Soil’ and  
296 ‘C.h.Rhizosphere-Soil’ we deduced the RhizoOTUs for *A. thaliana* (*A.t.RhizoOTUs*) and *C.*  
297 *hirsuta* (*C.h.RhizoOTUs*), respectively. The Fig. S12 displays the RhizoOTUs as identified  
298 for each species at both sites. From the comparison terms ‘A.t.Root-Soil’ and ‘C.h.Root-Soil’  
299 of the same Tukey test we determined the root-enriched OTUs for *A. thaliana*  
300 (*A.t.RootOTUs*) and *C. hirsuta* (*C.h.RootOTUs*), respectively. The Fig. S9 displays the  
301 species-specific RootOTUs at both sites. We then defined the RootOTUs for each site  
302 (reported in Figures 3A, 3B and S10A) with the union of *A.t.RootOTUs* and *C.h.RootOTUs* of  
303 a site. Finally, we compared the RootOTUs of the Cologne site with the RootOTUs of the  
304 Eifel site, of which we derived from the union and the intersection the 70 RootOTUs (Fig.  
305 S10A) of both natural sites and the shared 19 RootOTUs at the natural sites (Fig. S10A).

306 Thirdly, we examined the variation of the RootOTU community among the root samples of  
307 both natural sites as a function of the variables *site* and *host species*. The abundance of each  
308 of the 70 RootOTUs was modeled for the variables *site* (levels: Eifel and Cologne) and *host*  
309 *species* (levels: *A. thaliana*, *C. hirsuta*): ANOVA(Abundance\_of\_RootOTU ~ site \* host  
310 species, data=root\_samples\_both\_sites). The *P* values were calculated in the same way as for  
311 the community module analysis described above (Dataset S6 worksheet E). We subsequently  
312 conducted pair-wise comparisons between the sample groups of the *site:species* interaction  
313 using the Tukey method described above. The Tukey statistic table is presented in Dataset S6  
314 worksheet F. From the comparison terms ‘A.t.Cologne-C.h.Cologne’ and ‘A.t.Eifel-C.h.Eifel’  
315 we deduced the species-specific community members of each site as reported in Fig. S11.

### 316 *Greenhouse experiments*

317 The ANOVA analysis of the replicate greenhouse experiments followed the same overall  
318 strategy as for the natural site experiments. First, community modules were searched in the  
319 abundance matrices for the phylum (8 taxa, the division AD3 was not detected in the  
320 greenhouse experiments) and family (50 taxa, the family Pelobacteraceae was not detected in  
321 the greenhouse experiments) among the root samples of both replicate experiments for the  
322 variable *host species*. The abundance of each taxon was modeled for the variables *replicate*  
323 (levels: replicate 1, replicate 2) and *host species* (levels: *A. thaliana*, *A. halleri*, *A. lyrata* and  
324 *C. hirsuta*): TukeyHSD(ANOVA(Abundance\_of\_taxon ~ replicate \* host species,  
325 data=root\_samples\_both\_replicates)). We directly conducted pair-wise comparisons for the  
326 variable *host species* using the same Tukey and *P*-value correction method described for the  
327 community module analysis of the natural site experiments (Dataset S6 worksheet G). From

328 the comparison terms with all other plant species (e.g. for *A. thaliana*: *A. thaliana*-*A. halleri*,  
329 *A. thaliana*-*A. lyrata* and *A. thaliana*-*C. hirsuta*) we determined the species-specific  
330 community modules (Fig. S13).

331 Analog to the natural site analysis we then compared the bacterial communities at the level of  
332 individual members (OTUs) between soil and root samples. We calculated in each replicate  
333 experiment separately for each species the root-enriched OTUs (RootOTUs) from the  
334 comparison with the respective soil samples. The abundance of each OTU of the ACM was  
335 modeled for the 'sample groups' present in the greenhouse experiments:  
336 ANOVA(Abundance\_of\_OTU ~ sample\_group, data=by\_replicate). Sample groups  
337 comprised soil samples and root samples of *A. halleri*, *A. lyrata*, *A. thaliana* and *C. hirsuta*.  
338 We performed directly pair-wise comparisons between the *sample groups* using the same  
339 Tukey method as described above for the identification of the RootOTUs at the natural sites.  
340 From the comparison terms '*A. halleri*-Soil', '*A. lyrata*-Soil', '*A. thaliana*-Soil' and '*C.*  
341 *hirsuta*-Soil' we identified the RootOTUs for *A. halleri* (*A.h.*RootOTUs), *A. lyrata*  
342 (*A.l.*RootOTUs), *A. thaliana* (*A.t.*RootOTUs) and *C. hirsuta* (*C.h.*RootOTUs, Dataset S6  
343 worksheets H and I). From the union of the *A.h.*RootOTUs, *A.l.*RootOTUs, *A.t.*RootOTUs  
344 and *C.h.*RootOTUs of a replicate experiment we then defined the RootOTUs for each  
345 replicate experiment (reported in Fig. S19A). Of these we derived from the union the 76  
346 RootOTUs (Figs. 4A, S14) and from their intersection the shared 39 RootOTUs of the  
347 greenhouse experiments (Fig. S19A).

348 We then also investigated the variation in the RootOTU community among the root samples  
349 of both replicate experiments for the variable *host species*. The abundance of each of the 76  
350 RootOTUs was modeled for the variables *replicate* (levels: replicate 1, replicate 2), *host*  
351 *species* (levels: *A. thaliana*, *A. halleri*, *A. lyrata* and *C. hirsuta*) and *genotype* (levels: Col, Ler  
352 and Sha for the species *A. thaliana*): Tukey(ANOVA(Abundance\_of\_RootOTU ~ replicate \*  
353 *host species* \* genotype, data=root\_samples\_both\_replicates)). We performed directly pair-  
354 wise comparisons between the *host species* using the same Tukey and *P*-value correction  
355 method described for the community module analysis of the greenhouse experiments (Dataset  
356 S6 worksheet J). In the same way we also determined the species-specific community  
357 members from the comparison terms of a species with all other plant species (e.g. for *A.*  
358 *thaliana*: *A. thaliana*-*A. halleri*, *A. thaliana*-*A. lyrata* and *A. thaliana*-*C. hirsuta*; Fig. S16).

359 Finally, we assessed variation in root microbiota composition between and within host species  
360 by comparing the 3 *A. thaliana* ecotypes with the 3 *Arabidopsis* sister species. We excluded

361 the *C. hirsuta* samples for this direct comparison to have a balanced design of 3 levels for  
362 each of the variables *host species* and *host genotype*. We modeled the abundance of each of  
363 the ACM OTUs for the variables *replicate* (levels: replicate 1, replicate 2), *host species*  
364 (levels: *A. thaliana*, *A. halleri* and *A. lyrata*) and *genotype* (levels: Col, Ler and Sha for the  
365 species *A. thaliana*): ANOVA(Abundance\_of\_OTU ~ *replicate* \* *host species* \* *genotype*,  
366 data=Arabidopsis\_root\_samples\_both\_replicates). We determined the effect sizes of *host*  
367 *species* and *host genotype* from *P* values for each of variables, which were corrected for the  
368 number of tests performed using the BH method (Fig. S18 and Dataset S6 worksheet K).

#### 369 *Validation of ANOVA assumptions:*

370 We have examined the suitability of the ANOVA framework for dissecting taxa/OTU tables  
371 by testing the normality of data dispersion using the Shapiro-Wilk test. For each of the data  
372 subsets (see above) we tested the distribution of data points for each taxon/OTU. The Table  
373 S3 reports the test statistics of all data subsets and the number of taxa/OTUs in the respective  
374 sub-analysis that are normally distributed. We noted that between 26 and 67 % of the  
375 taxa/OTUs have normally distributed data points and we are aware that not all taxa/OTUs  
376 meet the formal requirements of an ANOVA analysis. Therefore, we have validated the  
377 ANOVA findings with non-parametric Mann-Whitney tests and a Bayesian statistic method.

378

#### 379 **Statistical analysis using non-parametric Mann-Whitney tests**

380 We examined the identification of RootOTUs as performed with the ANOVA approach based  
381 on the same statistical comparisons but using non-parametric Mann-Whitney tests. We tested  
382 the 237 individual OTUs of the ACM ('community members') for quantitative differences in  
383 abundance between soil and root communities. Analyses were performed with custom *R*  
384 scripts using the function *wilcox\_test* of the library *coin*.

#### 385 *Natural site experiments*

386 We conducted pair-wise comparisons between each group of root samples (*A. thaliana* root  
387 samples of the Eifel site = *A.t.Root\_Eifel*; *C.h.Root\_Eifel*, *A.t.Root\_Cologne* and  
388 *C.h.Root\_Cologne*) and their corresponding group of soil samples (Soil\_Eifel, Soil\_Cologne).  
389 We determined the root-enriched OTUs for *A. thaliana* from the Eifel site  
390 (*A.t.RootOTUs\_Eifel*) from the comparison term '*A.t.Root\_Eifel-Soil\_Eifel*' based on *P*  
391 values < 0.1 that were corrected for the number of OTUs tested using the BH method.

392 Analogous we defined the *C.h.*RootOTUs\_Eifel, *A.t.*RootOTUs\_Cologne and the  
393 *C.h.*RootOTUs\_Cologne (Dataset S6 worksheet L). We then defined the RootOTUs for each  
394 site with the union of the corresponding *A.t.*RootOTUs and *C.h.*RootOTUs and finally,  
395 comparing the RootOTUs of the Cologne site with the RootOTUs of the Eifel site, we derived  
396 from the intersection the shared 34 RootOTUs at both natural sites (Fig. S10B).

#### 397 *Greenhouse experiments*

398 Analogous to the natural site analysis we also compared the bacterial communities of soil  
399 samples and root samples from the replicate greenhouse experiments. We calculated in each  
400 replicate experiment separately for each species the root-enriched OTUs (RootOTUs) from  
401 the comparison with the respective soil samples using pair-wise comparisons. From the  
402 comparison terms '*A. halleri*-Soil', '*A. lyrata*-Soil', '*A. thaliana*-Soil' and '*C. hirsuta*-Soil'  
403 we identified the RootOTUs for *A. halleri* (*A.h.*RootOTUs), *A. lyrata* (*A.l.*RootOTUs), *A.*  
404 *thaliana* (*A.t.*RootOTUs) and *C. hirsuta* (*C.h.*RootOTUs, Dataset S6 worksheets M and N).  
405 From the union of the *A.h.*RootOTUs, *A.l.*RootOTUs, *A.t.*RootOTUs and *C.h.*RootOTUs of a  
406 replicate experiment we defined the RootOTUs for each replicate experiment (reported in Fig.  
407 S19A). Of these we derived from their intersection the shared 62 RootOTUs of the  
408 greenhouse experiments (Fig. S19B).

409

#### 410 **Statistical analysis using a Bayesian approach**

411 A more direct approach to find OTUs enriched in the roots in each of the tested species  
412 compared to soil is to test a single hypothesis instead of the intersection of multiple  
413 hypotheses via a Venn-diagram. One such approach, BayesianIUT, has been implemented by  
414 van Deun et al 2009 with the aim to find genes higher (or lower) expressed in one tissue  
415 compared to many other tissues (12). In our setting this approach calculates the support for  
416 two hypotheses: (1) that an OTU has lower abundance in the soil samples compared to root  
417 samples of each species and (2) that the OTU has at least in one of the species an equal or  
418 lower abundance compared to soil. The ratio of the support for each of the two hypotheses  
419 (Bayes factor) is calculated using a Bayesian approach in an ANOVA framework (12,  
420 <http://ppw.kuleuven.be/okp/software/bayesianiut/>). An OTU is root-enriched across all  
421 species if there is 30 times more support for the alternative hypothesis (12). We calculated the  
422 support for each hypothesis for both natural site experiments (Fig. S10B) and both greenhouse  
423 experiments (Fig. S19B). For natural site experiments we compared the root sample groups

424 *A.t.Eifel*, *C.h.Eifel*, *A.t.Cologne* and *C.h.Cologne* to the group of soil samples (both sites  
425 combined). We opposed the group of soil samples (both replicates combined) to all root  
426 samples as groups by species and replicate (*A.h.rep1*, *A.h.rep2*, *A.l.rep1*, *A.l.rep2*, *A.t.rep1*,  
427 *A.t.rep2*, *C.h.rep1* and *C.h.rep2*).

428

### 429 **Defining shared and core RootOTUs**

430 We defined the ‘shared RootOTUs’ both at natural sites (Fig. S10B) and in the greenhouse  
431 experiments (Fig. S19B) when they were supported by parametric Tukey (ANOVA), non-  
432 parametric Mann-Whitney and Bayesian statistics (see below). The intersection of the three  
433 methods revealed 14 and 26 shared RootOTUs for the natural site and the greenhouse  
434 experiments, respectively. We finally compared the shared RootOTUs of the natural sites with  
435 the shared RootOTUs of the greenhouse experiments and defined from their intersection the 9  
436 core RootOTUs (Fig. 5A).

437

### 438 **Canonical analysis of principal coordinates (CAP)**

439 To assess the influence of the different environmental and experimental factors on the beta  
440 diversity we calculated Bray-Curtis distances and then performed a Canonical Analysis of  
441 Principal coordinates (CAP) (13) constrained by the factor of interest and conditioning by the  
442 remaining variables. We employed R package *vegan* v2.0-8 (9) for the constrained ordination  
443 ('capscale' function for CAP analysis) as well as for the calculation of the significance values  
444 and confidence intervals ('permutest' permutation-based testing function).

445

### 446 **Bootstrap analysis**

447 We tested the robustness of our findings with respect to experiment-specific compositional  
448 variations and performed a bootstrap analysis across all samples. We generated 100 bootstrap  
449 sets of the same size as our original data set (77 samples) by drawing random samples with  
450 replacement. Then, we proceeded to split each set into four subsets, resembling our original  
451 natural sites and controlled environment experiments. We ensured that each subset contained  
452 4 soil samples and removed all duplicate samples resulting in an average of 69.54 samples  
453 ( $\pm 2.51$  s.e.m) per bootstrap set. We repeated for each bootstrap set the original ANOVA-

454 based analysis and determined the core RootOTUs shared among the natural site and  
455 greenhouse experiments. Fig. S20B depicts the members of core RootOTUs members for each  
456 bootstrap set and provides their taxonomic assignment at order rank.

457

### 458 **Quantitative PCR of Thermomonosporaceae OTUs**

459 The DNA samples of the greenhouse experiment #1 and the Eifel site, which were  
460 pyrosequenced, were also used as template for quantitative PCR (qPCR) validation. From our  
461 previous study we utilized the PCR primers that were designed on the basis of an  
462 Actinocorallia OTU (3). Pyrosequencing of these Actinocorallia PCR primer amplicons  
463 revealed that they match up to 100% to sequences belonging to the order Actinomycetales.  
464 We employed the PCR primer combination of 799F (14) and 904R (15) to generate a 16S  
465 rDNA amplicon to quantify the whole bacterial community in the DNA samples. The qPCR  
466 was performed using the same DFS Taq DNA Polymerase system (Bioron, Ludwigshafen,  
467 Germany) as for the library preparation described above with the exception that 0.5 µl of  
468 EvaGreen<sup>TM</sup> dye (Biotium, Hayward, USA) in a total volume of 25 µl was used. Cycling  
469 conditions were 3' at 94°C, 40 cycles with 30'' at 94°C, 30'' at 55°C and 20'' at 72°C  
470 acquiring fluorescence followed by 10' at 72°C. We performed a melting curve analysis  
471 starting from 60°C to 95°C increasing by half degrees/per 10'' to determine the uniformity of  
472 the amplicons. We normalized the abundance of Actinocorallia PCR primer amplicons with  
473 the abundance of 799F-904R community amplicons. These values were then transformed to  
474 express the proportional abundances across all samples to compare with the quantification by  
475 pyrosequencing. The pyrosequencing determined relative abundance values of all ACM  
476 OTUs, which were assigned to the family Thermomonosporaceae, were summed to obtain the  
477 cumulative Thermomonosporaceae abundance per sample. These values were then also  
478 transformed to express the proportional abundances across all samples. Overall correlation  
479 between 454 and qPCR quantifications of Thermomonosporaceae abundance is 0.82 and 0.96  
480 for the greenhouse experiment #1 samples and the Eifel site samples, respectively. The  
481 abundances of Thermomonosporaceae quantified by qPCR and pyrosequencing are depicted  
482 in Fig. S17.

483

484

## 485 **Core root microbiota comparison across studies**

486 We have downloaded the raw sequence data of the Bulgarelli et al. (2012), Lundberg et al.  
487 (2012) and Bodenhausen et al. (2013) studies from their respective data repositories for a  
488 comparative analysis with the data of this study. Sequences were concatenated to libraries  
489 according to the experimental design described in the respective manuscripts and we  
490 processed the data using the QIIME pipeline described above. With the script  
491 *split\_libraries.py* we extracted the individual soil and root samples according to their barcodes  
492 and filtered for quality sequences. We utilized for the Bulgarelli and the Bodenhausen  
493 sequences the same quality filtering criteria (read length, Phred score, no ambiguous base  
494 calls in barcode and primer) as for the data of this study (see above). We filtered the Lundberg  
495 sequence data for read length (min. 220 bp) and quality (Phred 25) utilizing the quality  
496 criteria of their study (17). The sequences of the Lundberg and the Bodenhausen datasets were  
497 reversed to the complement sequence as they were barcode-indexed with and sequenced from  
498 the reverse primer. A single fasta file containing the quality sequences of the four datasets  
499 was used as input for the script *pick\_otus.py*. We utilized reference-based OTU picking based  
500 on uclust (5), the Greengenes OTUs as reference database (7; release gg\_otus\_13\_05)  
501 allowing the formation of clusters independently of database reference seeds. The latter  
502 results in de novo OTUs, in addition to OTUs identified in the reference database. We co-  
503 clustered the quality sequences of the four datasets into OTUs at 97 % sequence similarity and  
504 a common OTU table was prepared after trimming chimeric sequences/OTUs, removing of  
505 plant-derived sequences and taxonomic assignment of the OTU representative sequences as  
506 described above. This common OTU table and OTU representative fasta sequences are  
507 provided as Dataset S9 and Dataset S10, respectively. For the subsequent analysis in R, the  
508 common OTU table was splitted into OTU tables for each study. The common origin of these  
509 OTU tables permits the direct comparison of OTU IDs between studies. OTUs assigned to the  
510 phylum Chloroflexi were removed from the OTU table of the Bulgarelli dataset (see reference  
511 3). The data of this study allowed a minimal sampling depth of 6,000 and the Bodenhausen of  
512 4,500 sequences per sample. We chose the samples from the Bulgarelli and Lundberg studies  
513 to contain at least 1,000 sequences per sample. Samples with fewer sequences were removed  
514 from the OTU tables and the remaining samples were rarefied according to the sampling  
515 depth of each study (Dataset S7). The Lundberg dataset was finally represented by 80 soil  
516 (number of samples: Clayton replicate 1  $n_{CL1}$  22,  $n_{CL2}$  18, Mason Farm replicate 1  $n_{M1}$  20,  $n_{M2}$   
517 20) and 265 root samples ( $n_{CL1}$  48,  $n_{CL2}$  35,  $n_{M1}$  78,  $n_{M2}$  104). The Bulgarelli data was



518 represented in the analysis with 21 soil (number of samples: Cologne replicate 1  $n_{C1}$  2,  $n_{C2}$  8,  
519 Golm replicate 1  $n_{G1}$  6,  $n_{G2}$  5) and 32 root samples ( $n_{C1}$  10,  $n_{C2}$  8,  $n_{G1}$  7,  $n_{G2}$  7).

520 Subsequently, we defined for each study the ACM, i.e. OTUs with a minimum of 20 quality  
521 sequences in at least one of the samples within a study. The ACM contained 90, 152, 77 and  
522 260 OTUs in the Bulgarelli, Lundberg, Bodenhausen and in this study, respectively. We then  
523 normalized the counts of individual ACM OTUs by dividing the total counts of all ACM  
524 OTUs within a sample followed by a multiplication by 1,000, representing per mill RA. The  
525 normalized ACM data of each study was examined separately for the core microbiota  
526 following the same logic and same statistic analysis pipeline described above. Due to the  
527 differences between reference-based and de novo OTU clustering, the data of this study was  
528 re-analyzed for comparison with the remaining datasets. RootOTUs - OTUs that are enriched  
529 in root compared to soil samples - constitute the basis of the analysis and were calculated  
530 between soil and root samples within each replicate experiment. Then, following the analysis  
531 logic, we proceeded to identify the RootOTUs that were shared between the natural sites, and  
532 the ones shared between the two greenhouse replicate experiments. Only OTUs identified  
533 with each of the 3 statistic approaches (see above) were defined as shared RootOTUs. The  
534 overlap between the shared RootOTUs of the natural sites and the shared RootOTUs of the  
535 greenhouse experiments was referred to as the core RootOTUs. The Lundberg dataset was  
536 examined following the same procedure where the Lundberg core RootOTUs present the  
537 overlap between the shared RootOTUs of the Clayton soil experiments and the shared  
538 RootOTUs of the Mason Farm soil replicates. Also here, shared RootOTUs were defined by  
539 the 3 statistic tests. The Bulgarelli core RootOTUs present the overlap between the RootOTUs  
540 found in the Cologne soil and the Golm soil experiments (RootOTUs were defined by the 3  
541 statistic tests). We combined the samples of the replicate Cologne and Golm soil experiments,  
542 respectively, because the few soil samples in the first Cologne soil replicate prevented a  
543 statistically sensible identification of RootOTUs. Although a limited number of root  
544 endophyte samples were harvested, we chose to include the Bodenhausen et al. (2013) data in  
545 the analysis because the same PCR primer combination was used. This study does not include  
546 soil microbiota profiles, precluding the determination of RootOTUs. Therefore, we compared  
547 the root endophyte profiles across the four natural sites tested based on OTUs that are  
548 abundant at all sites, i.e. that have a minimal abundance of 5 per mille RA in all samples.  
549 Finally, we compared the core root microbiota of each study between the four studies.

550

551 All QIIME and R scripts used for computational analyses are available via  
552 [http://www.mpipz.mpg.de/R\\_scripts](http://www.mpipz.mpg.de/R_scripts).

553

553 **References:**

- 554 1. Van Rossum F, *et al.* (2004) Spatial genetic structure within a metallicolous  
555 population of *Arabidopsis halleri*, a clonal, self-incompatible and heavy-metal-tolerant  
556 species. *Molecular ecology* 13(10):2959-2967.
- 557 2. Willems G, *et al.* (2007) The genetic basis of zinc tolerance in the metallophyte  
558 *Arabidopsis halleri* ssp. *halleri* (Brassicaceae): an analysis of quantitative trait loci.  
559 *Genetics* 176(1):659-674.
- 560 3. Bulgarelli D, *et al.* (2012) Revealing structure and assembly cues for *Arabidopsis*  
561 root-inhabiting bacterial microbiota. *Nature* 488(7409):91-95.
- 562 4. Caporaso JG, *et al.* (2010) QIIME allows analysis of high-throughput community  
563 sequencing data. *Nat Methods* 7(5):335-336.
- 564 5. Edgar RC (2010) Search and clustering orders of magnitude faster than BLAST.  
565 *Bioinformatics* 26(19):2460-2461.
- 566 6. Haas BJ, *et al.* (2011) Chimeric 16S rRNA sequence formation and detection in  
567 Sanger and 454-pyrosequenced PCR amplicons. *Genome Res* 21(3):494-504.
- 568 7. McDonald D, *et al.* (2012) An improved Greengenes taxonomy with explicit ranks for  
569 ecological and evolutionary analyses of bacteria and archaea. *Isme Journal* 6(3):610-  
570 618.
- 571 8. Caporaso JG, *et al.* (2010) PyNAST: a flexible tool for aligning sequences to a  
572 template alignment. *Bioinformatics* 26(2):266-267.
- 573 9. Oksanen J, *et al.* (2012) vegan: Community Ecology Package. Version 2.0-3.
- 574 10. Kristiansson E, Hugenholtz P, & Dalevi D (2009) ShotgunFunctionalizeR: an R-  
575 package for functional comparison of metagenomes. *Bioinformatics* 25(20):2737-  
576 2738.
- 577 11. Benjamini Y, & Hochberg Y (1995) Controlling the false discovery rate: a practical  
578 and powerful approach to multiple testing. *Journal of the Royal Statistical Society*  
579 *Series B*, 57, 289–300.
- 580 12. Van Deun K, *et al.* (2009) Testing the hypothesis of tissue selectivity: the  
581 intersection–union test and a Bayesian approach. *Bioinformatics* 25(19):2588-2594.
- 582 13. Anderson MJ & Willis TJ (2003) Canonical Analysis of Principal Coordinates: a  
583 useful method of constrained ordination for ecology. *Ecology* 84:511–525.
- 584 14. Chelius MK & Triplett EW (2001) The Diversity of Archaea and Bacteria in  
585 Association with the Roots of *Zea mays* L. *Microb Ecol* 41(3):252-263.

- 586 15. Hodkinson B & Lutzoni F (2009) A microbiotic survey of lichen-associated bacteria  
587 reveals a new lineage from the Rhizobiales. *Symbiosis* 49(3):163-180.
- 588 16. Benson AK, *et al.* (2010) Individuality in gut microbiota composition is a complex  
589 polygenic trait shaped by multiple environmental and host genetic factors. *Proc Natl*  
590 *Acad Sci U S A* 107(44):18933-18938.
- 591 17. Lundberg DS, *et al.* (2012) Defining the core *Arabidopsis thaliana* root microbiome.  
592 *Nature* 488(7409):86-90.
- 593 18. Bodenhausen N, Horton MW, & Bergelson J (2013) Bacterial Communities  
594 Associated with the Leaves and the Roots of *Arabidopsis thaliana*. *PLoS ONE* 8(2).

595

595 **Supplementary Figures:**

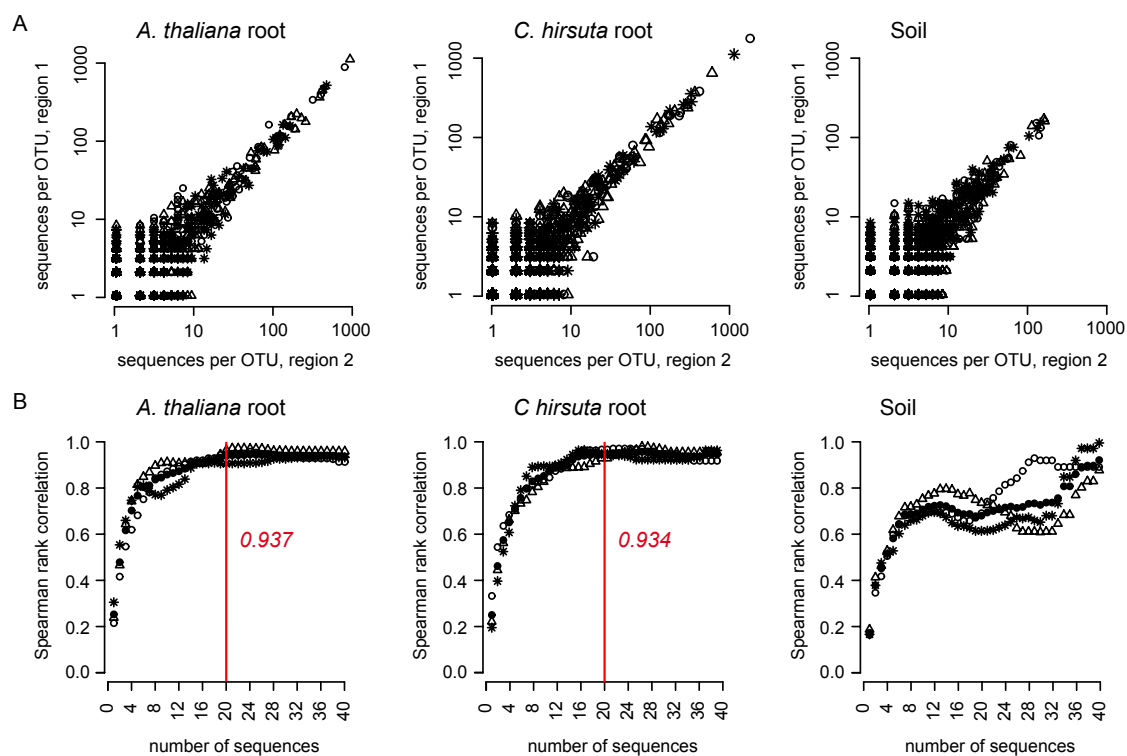

596

597 **Fig. S1. Technical reproducibility of repeated library sequencing.** Parallel emPCRs were  
 598 conducted for the amplicon library of the first greenhouse replicate experiment (Library L28)  
 599 and sequenced on separate regions of the 454 pico titer plate. Regions 1 and 2 generated  
 600 368,675 and 416,352 of quality sequences with a minimum of 8,615 sequences per sample.  
 601 We defined OTUs on co-clustered quality sequences (chimera and plant-DNA sequence  
 602 derived OTUs were removed) and corrected for differences in sequencing depths by  
 603 rarefaction to 6,000 sequences per sample. (A) The number of quality sequences per OTU as  
 604 retrieved from each region is plotted for the three *A. thaliana* root samples (GHrep1AtCol1,  
 605 circles; GHrep1AtCol2, triangles; GHrep1AtCol3, snowflakes), the three *C. hirsuta* root  
 606 samples (GHrep1ChOx1, circles; GHrep1ChOx2, triangles; GHrep1ChOx3, snowflake) and  
 607 the three soil samples (GHrep1Soil1, circles; GHrep1Soil2, triangles; GHrep1Soil3,  
 608 snowflakes). (B) Non-parametric Spearman rank correlation of OTU abundances in the  
 609 samples shown in (A) and their mean correlation values (filled circles) are plotted as a  
 610 function of progressive thresholds (1 to 40) for the minimal number of sequences per OTU in  
 611 a sample of the dataset. For the root samples, the red line indicates the threshold of 20  
 612 sequences per OTU and the corresponding Spearman rank correlation value (mean of 3  
 613 samples) is given in the plots. The threshold we identified is similar to previous studies (3, 16,  
 614 17).

615

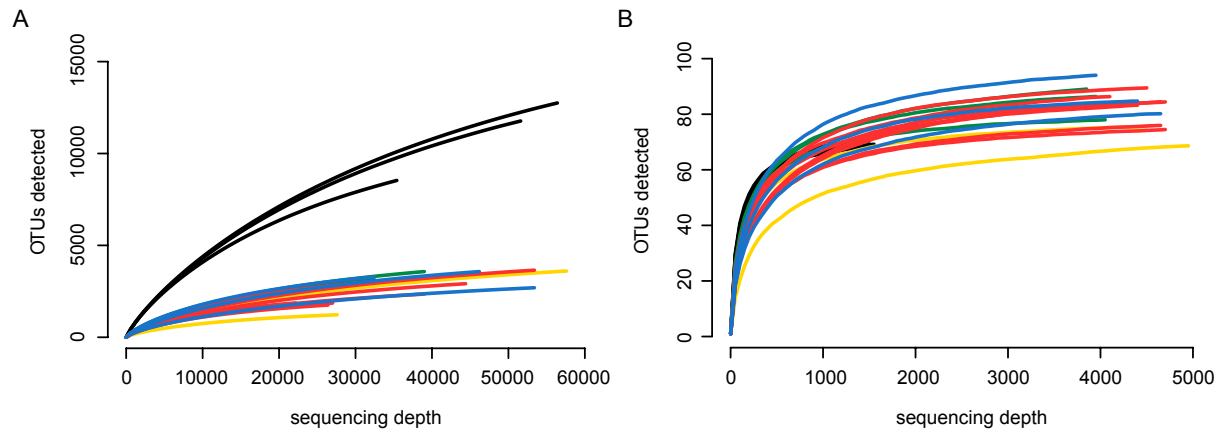

615

616 **Fig. S2. Rarefaction analysis.** The pooling of the sequences from both pico titer plate regions  
 617 of the first greenhouse replicate experiment (Library L28) permitted to display the bacterial  
 618 communities with a sequencing depth of 17,441 – 58,150 quality sequences per sample  
 619 (Dataset S1). We defined OTUs on co-clustered quality sequences and performed rarefaction  
 620 analysis for the soil (black) and root (colored) samples. Root samples include *A. halleri*  
 621 (green), *A. lyrata* (yellow), *A. thaliana* (red) and *C. hirsuta* (blue). Rarefaction curves are  
 622 based on all quality sequences obtained (A) and on the ACM dataset (B).

623

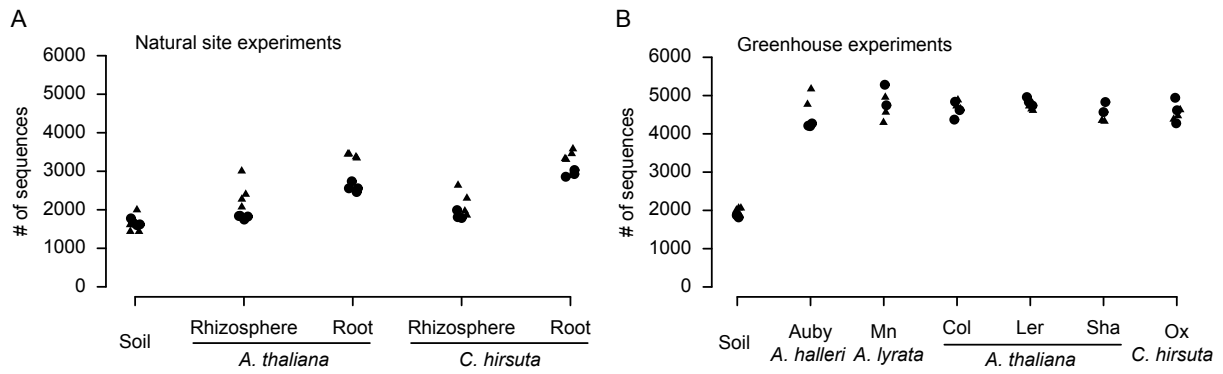

623

624 **Fig. S3. Quality sequences after application of the threshold.** Number of quality sequences  
 625 in the ACM after thresholding the dataset to OTUs, which reach in at least one sample a  
 626 minimum of 20 quality sequences. (A) Circles depict the Eifel site samples whereas triangles  
 627 show Cologne site samples. (B) In the greenhouse experiments, the circles and triangles refer  
 628 to the first and the second replicate experiment, respectively.

629

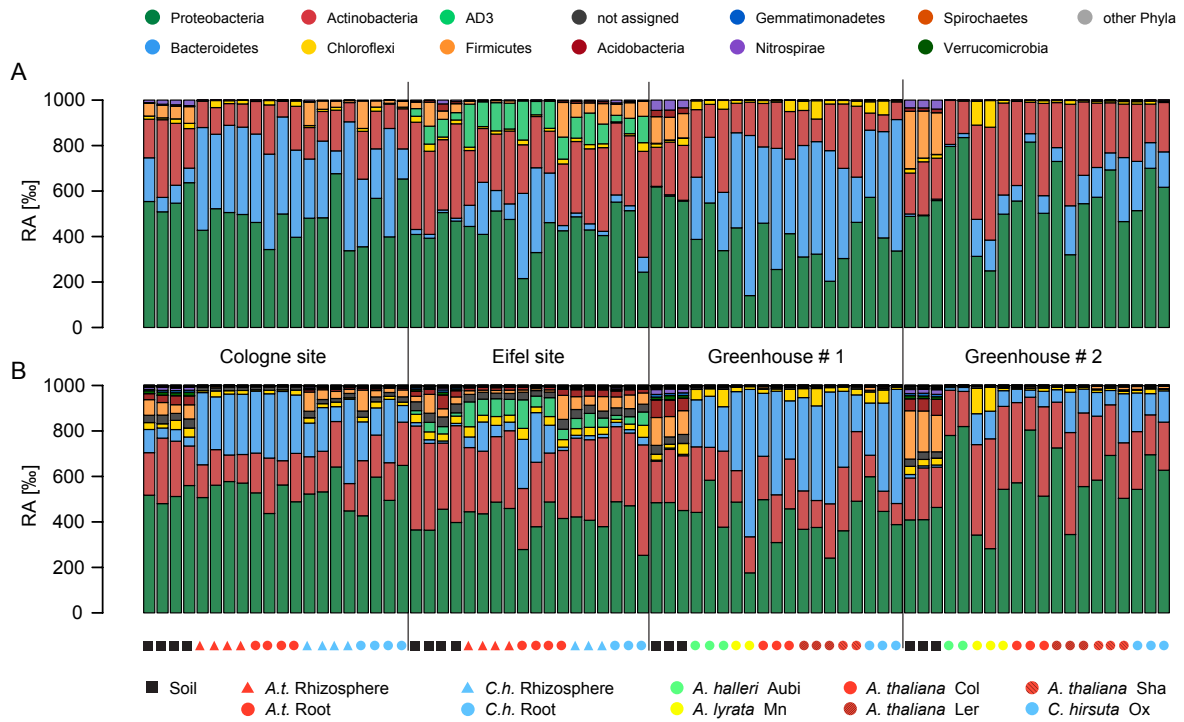

629

630 **Fig. S4. Taxonomy overview.** Taxonomic structure at the phylum rank of the ACM (A) and  
 631 the TIC (B). Soil samples are marked with black squares and rhizosphere (triangles) and root  
 632 samples (circles) are colored by plant species: *A. halleri* (green), *A. lyrata* (yellow), *A.*  
 633 *thaliana* (red) and *C. hirsuta* (blue). The *A. thaliana* ecotypes discriminate by shading.

634



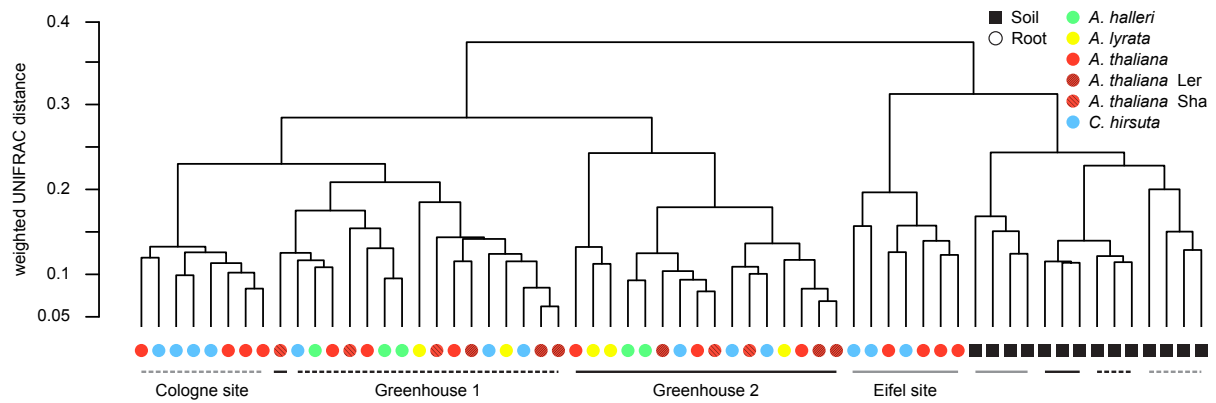

634

635 **Fig. S5. Beta diversity.** Between-sample diversity was calculated for TICs using weighted  
 636 UniFrac distance metric (Phylogeny-based and sensitive to the sequence abundances) on  
 637 6,000 sequences per sample. The *A. thaliana* ecotype Col (non-shaded red) was used in the  
 638 greenhouse experiments.

639

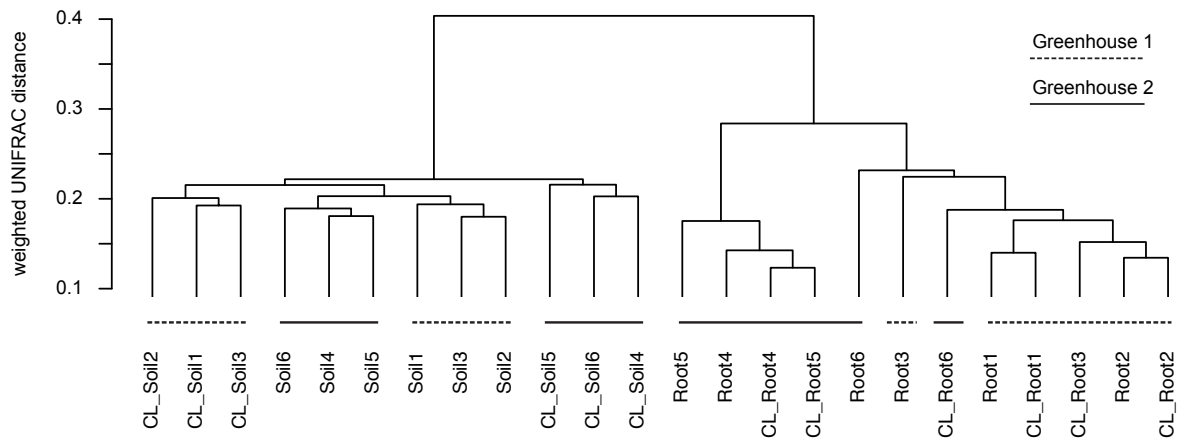

639

640 **Fig. S6. Biological versus technical variation.** DNA samples of the 3 *A. thaliana* root  
 641 (Ecotype Col-0) and 3 soil samples, from the greenhouse replicate #1 (indexes 1 to 3) and #2  
 642 (indexes 4 to 6), were utilized for community profiles generated in a common control library  
 643 (CL, library L40). The weighted UniFrac distance was calculated based on communities  
 644 containing 530 sequences per sample.

645

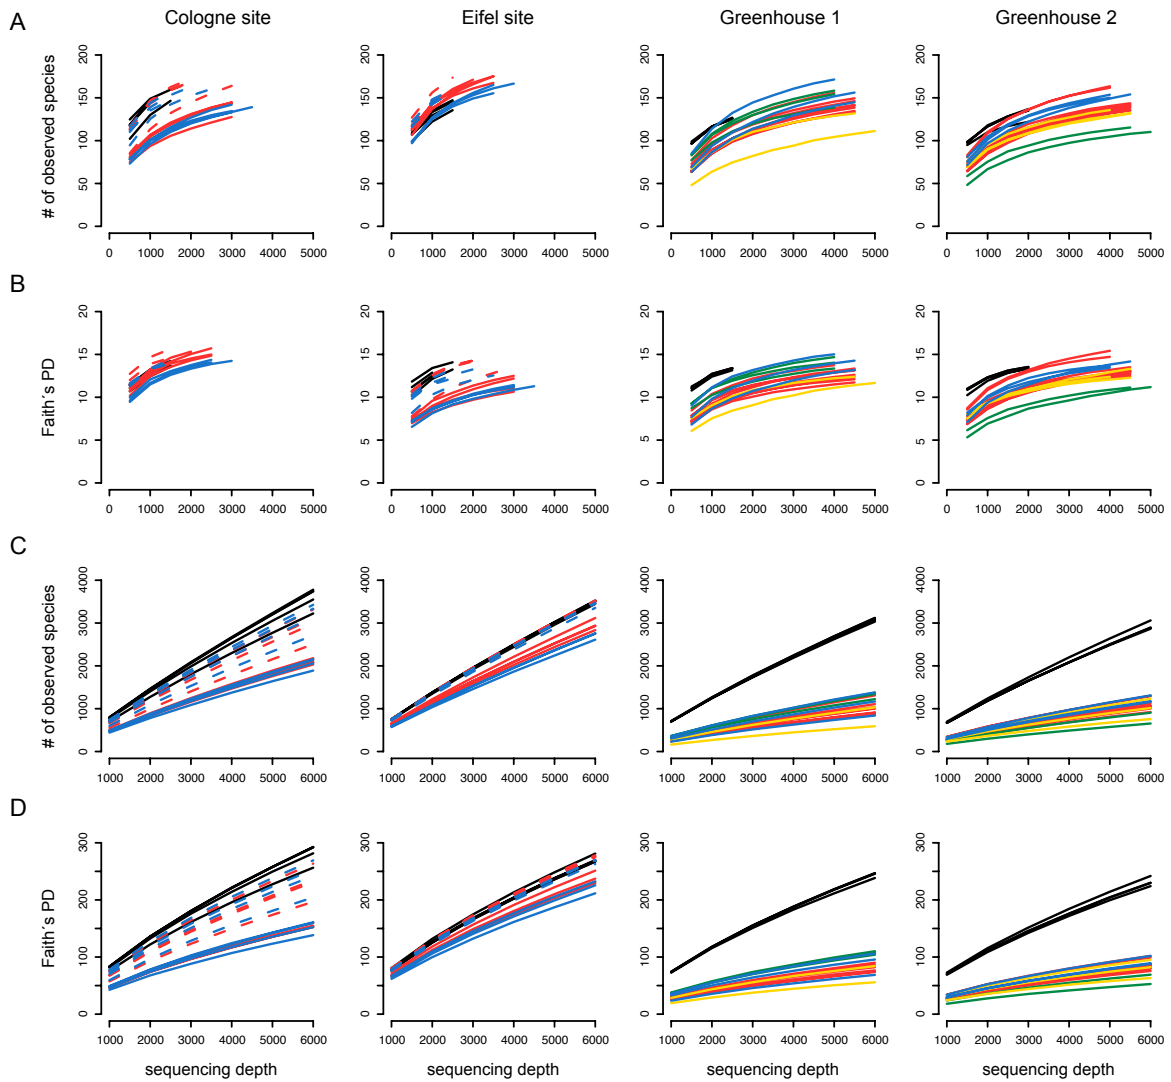

645

646 **Fig. S7. Alpha diversity analyses.** Within-sample diversity of the ACM (A and B) and TICs  
 647 (C and D) was measured by OTU richness (A and C) and with Faith's Phylogenetic Diversity  
 648 (PD) metric (B and D). Alpha diversity is plotted as a function of the sequencing depth in the  
 649 samples of the natural sites Cologne and Eifel and from the two replicate greenhouse  
 650 experiments. Samples are colored as follows: Soil (black), *A. halleri* (green), *A. lyrata*  
 651 (*A. thaliana* (red) and *C. hirsuta* (blue) root and rhizosphere samples with solid and  
 652 hashed lines, respectively. Mean values of 100 rarefactions at each sampling depth are shown.

653

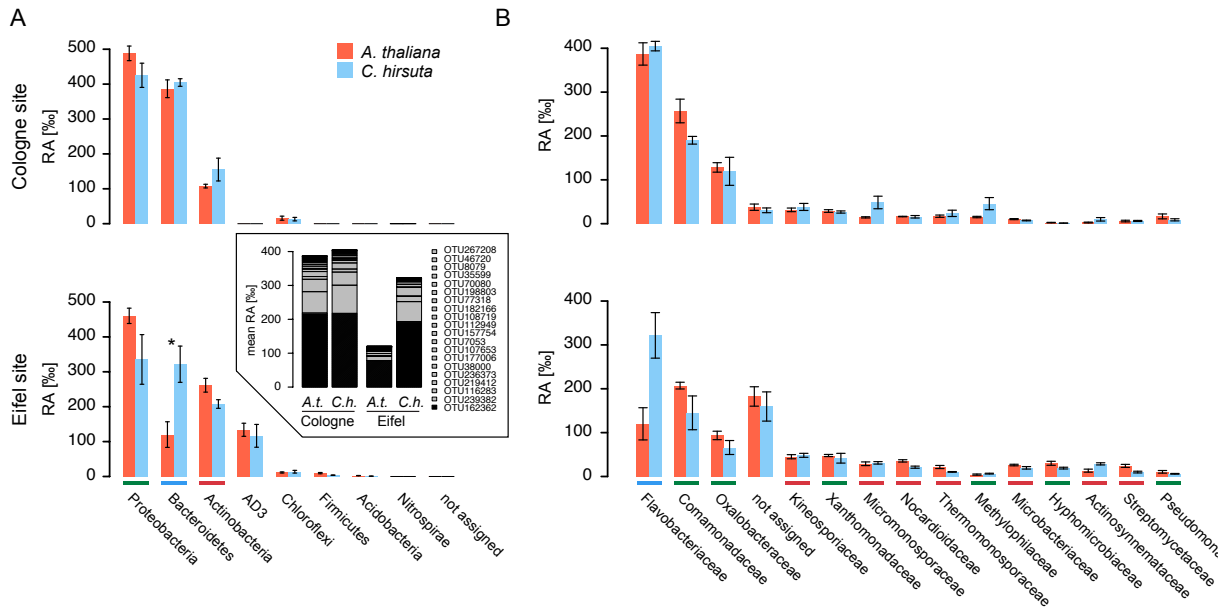

653

654 **Fig. S8. Taxonomical profiles of *A. thaliana* and *C. hirsuta* root communities from**  
 655 **Cologne and Eifel sites.** Mean relative abundance (RA,  $\pm$ s.e.m.) of taxa detected in root  
 656 communities (color-coded by species) at the phylum (A) and the family rank (B). The  
 657 affiliation of each family taxon (B) is color-coded to its corresponding phylum (A). Asterisks  
 658 indicate significant differences between *A. thaliana* and *C. hirsuta* root communities (Tukey,  
 659  $P < 0.1$  (FDR)). The inset in A reports the stacked abundances of individual OTUs assigned to  
 660 the phylum Bacteroidetes in roots of *A. thaliana* (*A.t.*) and *C. hirsuta* (*C.h.*) for both sites and  
 661 the dominant Flavobacterium OTU (OTU162362) is marked in black.

662

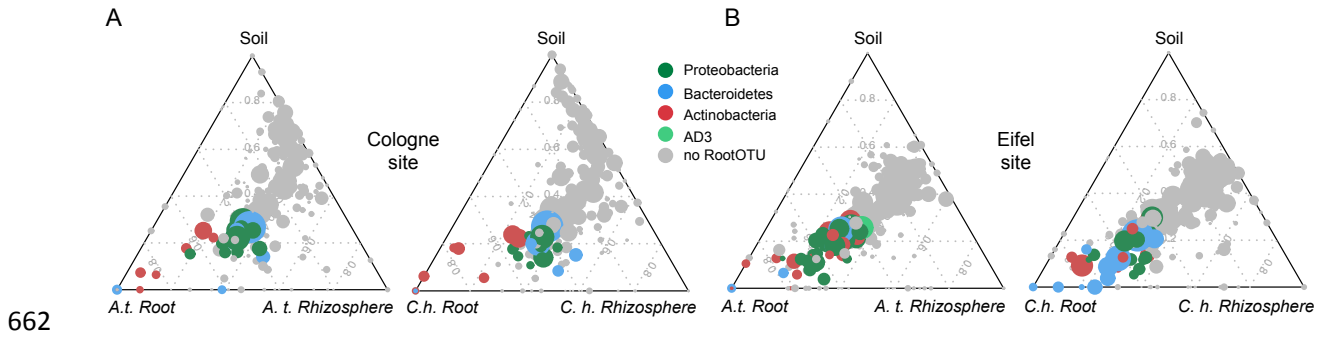

**Fig. S9. RootOTUs per species and site.** RootOTUs are OTUs that are enriched in roots compared to the corresponding soil communities (Tukey,  $P < 0.1$  (FDR)). RootOTUs are colored by taxonomy and OTUs, which are not enriched in root communities, are plotted in grey. The ternary plots depict the relative occurrence of individual OTU (circles) in the indicated sample types of *A. thaliana* (*A.t.*) and *C. hirsuta* (*C.h.*) compared to soil for the Cologne (A) and the Eifel site (B). The size of the circles is proportional to the mean abundance in the community.

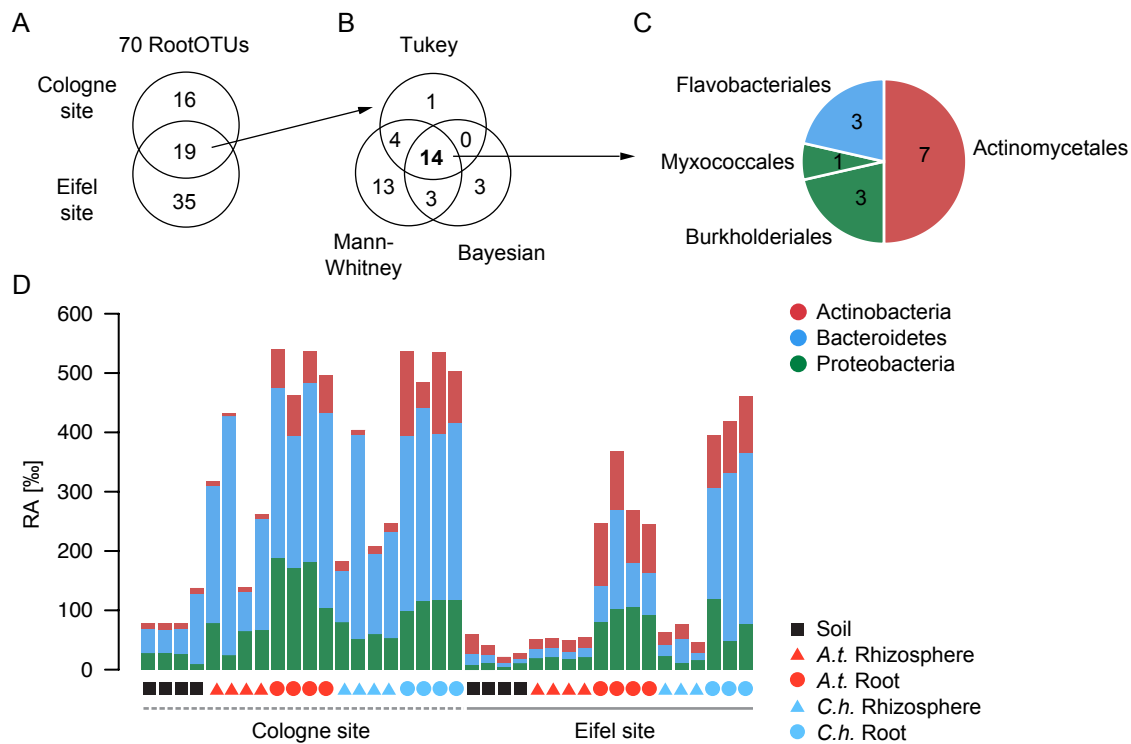

670

671 **Fig. S10. Identification of shared RootOTUs of the natural site experiments.** (A) The  
 672 Venn diagram identifies 19 shared RootOTUs of the 70 RootOTUs of both sites Cologne and  
 673 Eifel based on parametric statistics, (Tukey,  $P < 0.1$  (FDR)). (B) RootOTUs shared between  
 674 the two sites were identified with non-parametric Mann-Whitney and Bayesian statistics and  
 675 we defined the 'shared RootOTUs' from the validation by all three different statistical  
 676 methods. (C) The pie chart reports the taxonomic composition of the 14 shared RootOTUs at  
 677 the order rank. (D) Stacked relative abundance (RA) of the shared RootOTUs of the Cologne  
 678 and Eifel sites. Each segment in the bar corresponds to one of the 14 shared RootOTUs.

679

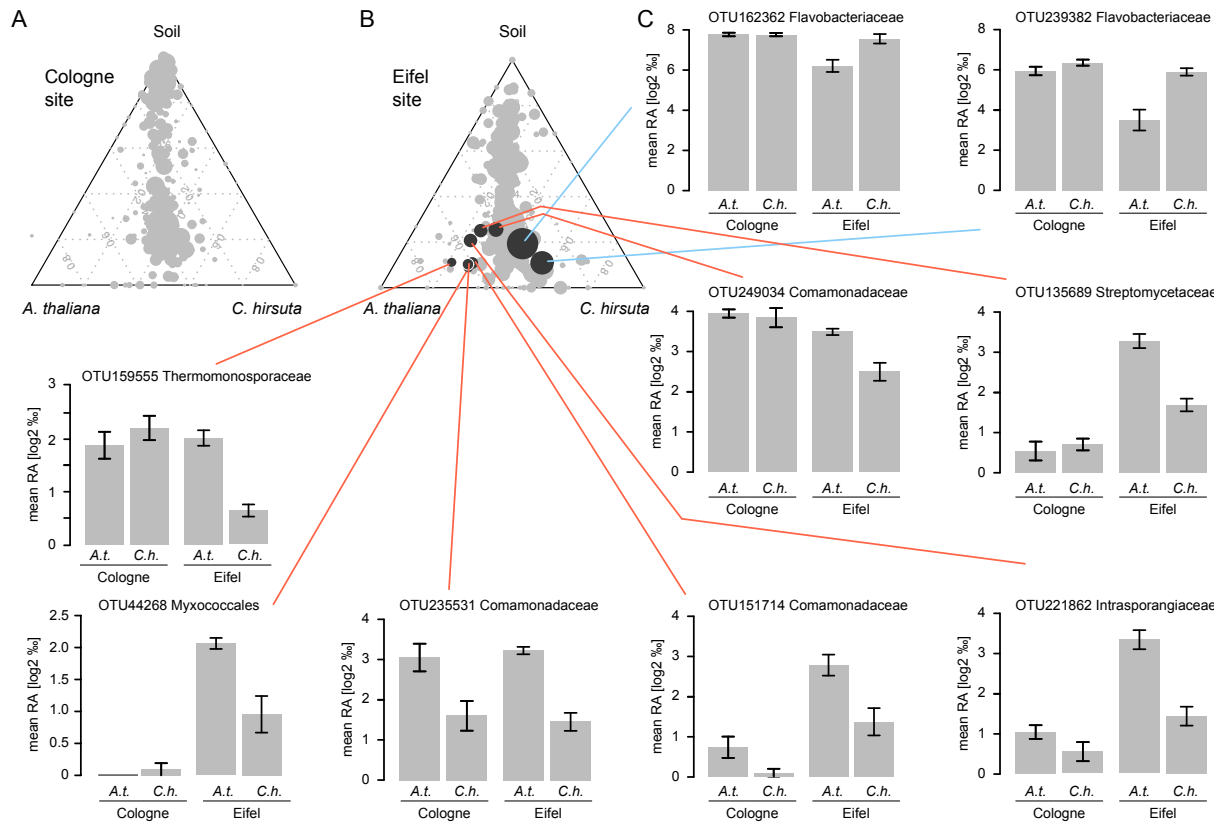

679

680 **Fig. S11. Species-specific accumulation of OTUs.** The ternary plots (corresponding to  
 681 Figure 3) depict the relative occurrence of individual OTUs (circles) in root communities of  
 682 *A. thaliana* and *C. hirsuta* compared to the respective soil microbiota for the Cologne (A) and  
 683 the Eifel site (B). RootOTUs accumulating significantly different between *A. thaliana* and *C.*  
 684 *hirsuta* are highlighted in dark grey (Tukey,  $P < 0.1$  (FDR)) and are linked with their  
 685 corresponding bargraphs (log<sub>2</sub> abundance ( $\pm$ s.e.m.)). Red (*A. thaliana*) and blue (*C. hirsuta*)  
 686 colored lines mark the species-specific enrichment of the RootOTUs. OTUs are labeled with  
 687 OTU-ID and taxonomic assignments at family or order rank.

688

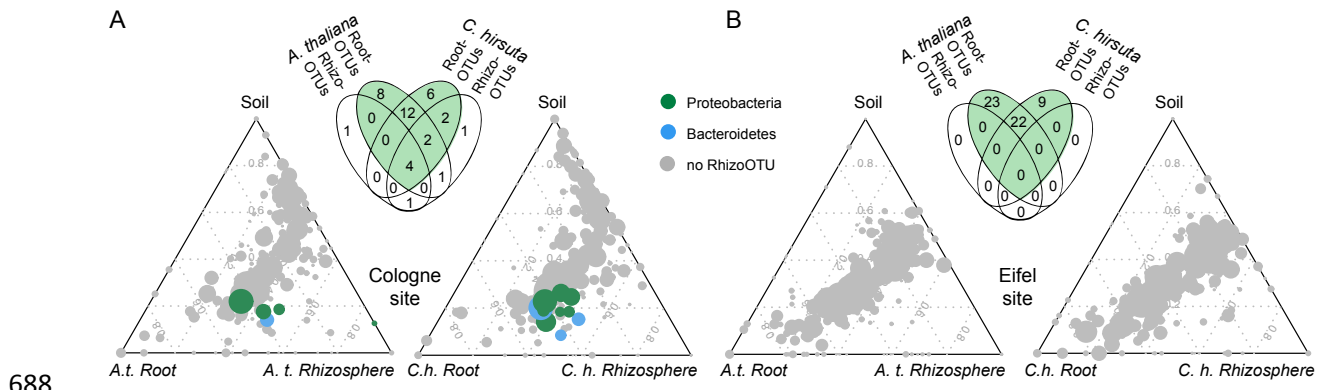



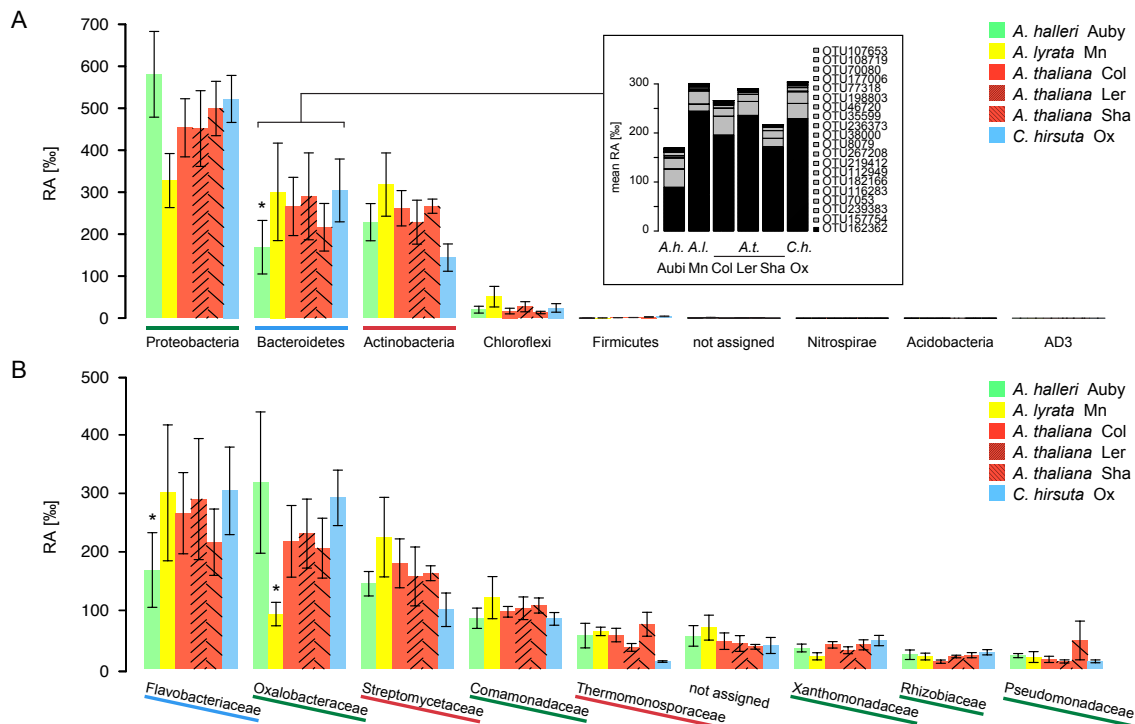

698

699 **Fig. S13. Taxonomic profiles of *A. thaliana* and relative species grown under controlled**  
 700 **conditions.** Mean abundance ( $\pm$ s.e.m.) of taxa detected in root communities (colorcoded by  
 701 species) of the ACM at the phylum (A) and the family rank (B). The 9 most abundant families  
 702 are shown. The affiliation of each family taxon (B) is color-coded corresponding to its  
 703 phylum (A). Asterisks indicate species-specific differences between the indicated species  
 704 (Tukey;  $P < 0.1$  (FDR)). The inset in A reports the stacked abundances of individual OTUs  
 705 (OTU-IDs in the legend) assigned to the phylum Bacteroidetes in roots of *A. halleri* (*A.h.*), *A.*  
 706 *lyrata* (*A.l.*), *A. thaliana* (*A.t.*) and *C. hirsuta* (*C.h.*) and the dominant Flavobacterium OTU  
 707 (OTU162362) is marked in black.

708

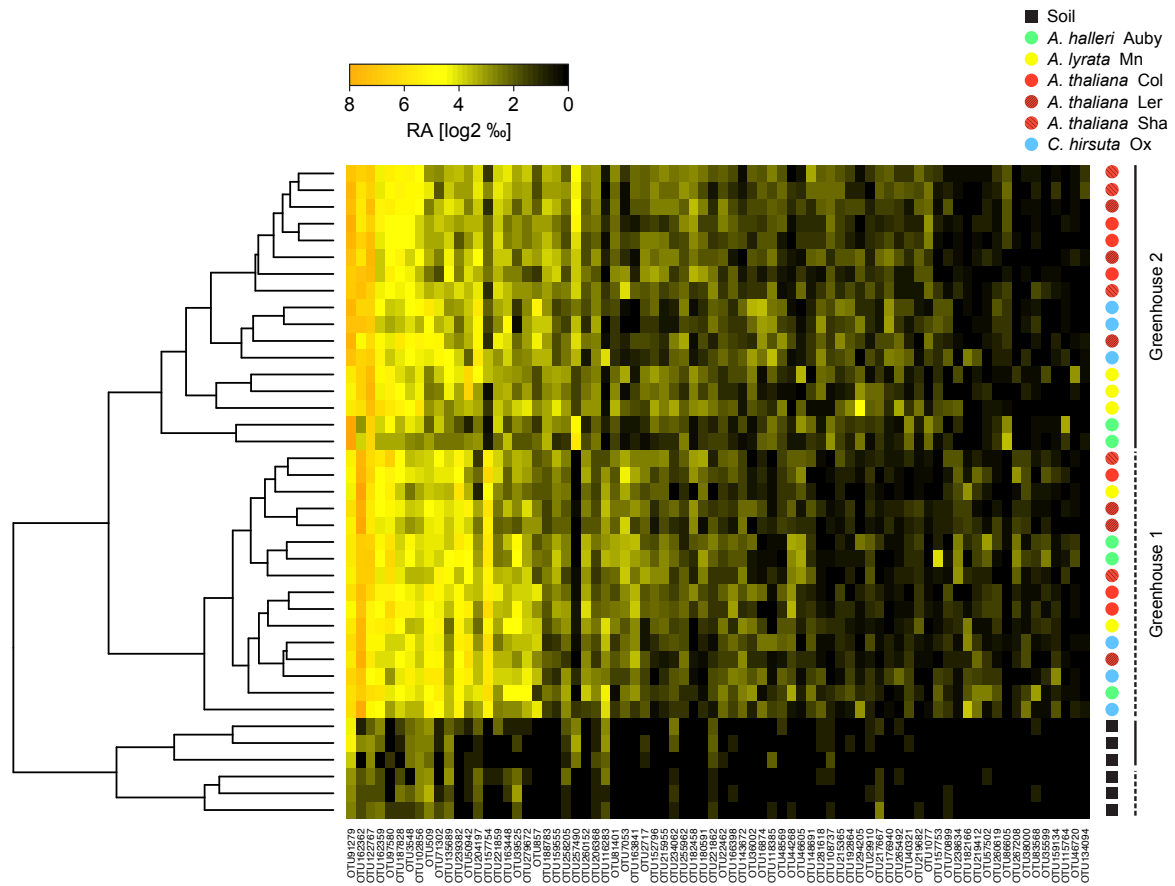

708

709 **Fig. S14. The root-enriched microbiota of *A. halleri*, *A. lyrata*, *A. thaliana* and *C. hirsuta*.**

710 The abundance of RootOTUs of all greenhouse samples is displayed and sorted by mean rank

711 abundance (x-axis). Hierarchical clustering is based on average Pearson distances.

712

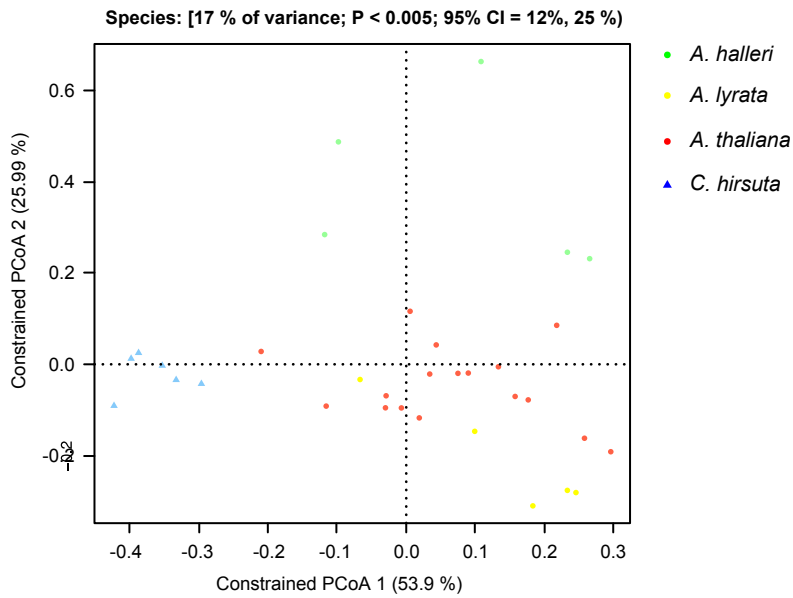

712

713 **Fig. S15. Sample scores of RootOTU communities based on Bray-Curtis distances.** The  
 714 RootOTU communities of greenhouse samples were utilized for canonical analysis of  
 715 principal coordinates, which was constrained for the variable host species. The corresponding  
 716 OTU scores and sample arrows are presented in Fig. 4B.

717

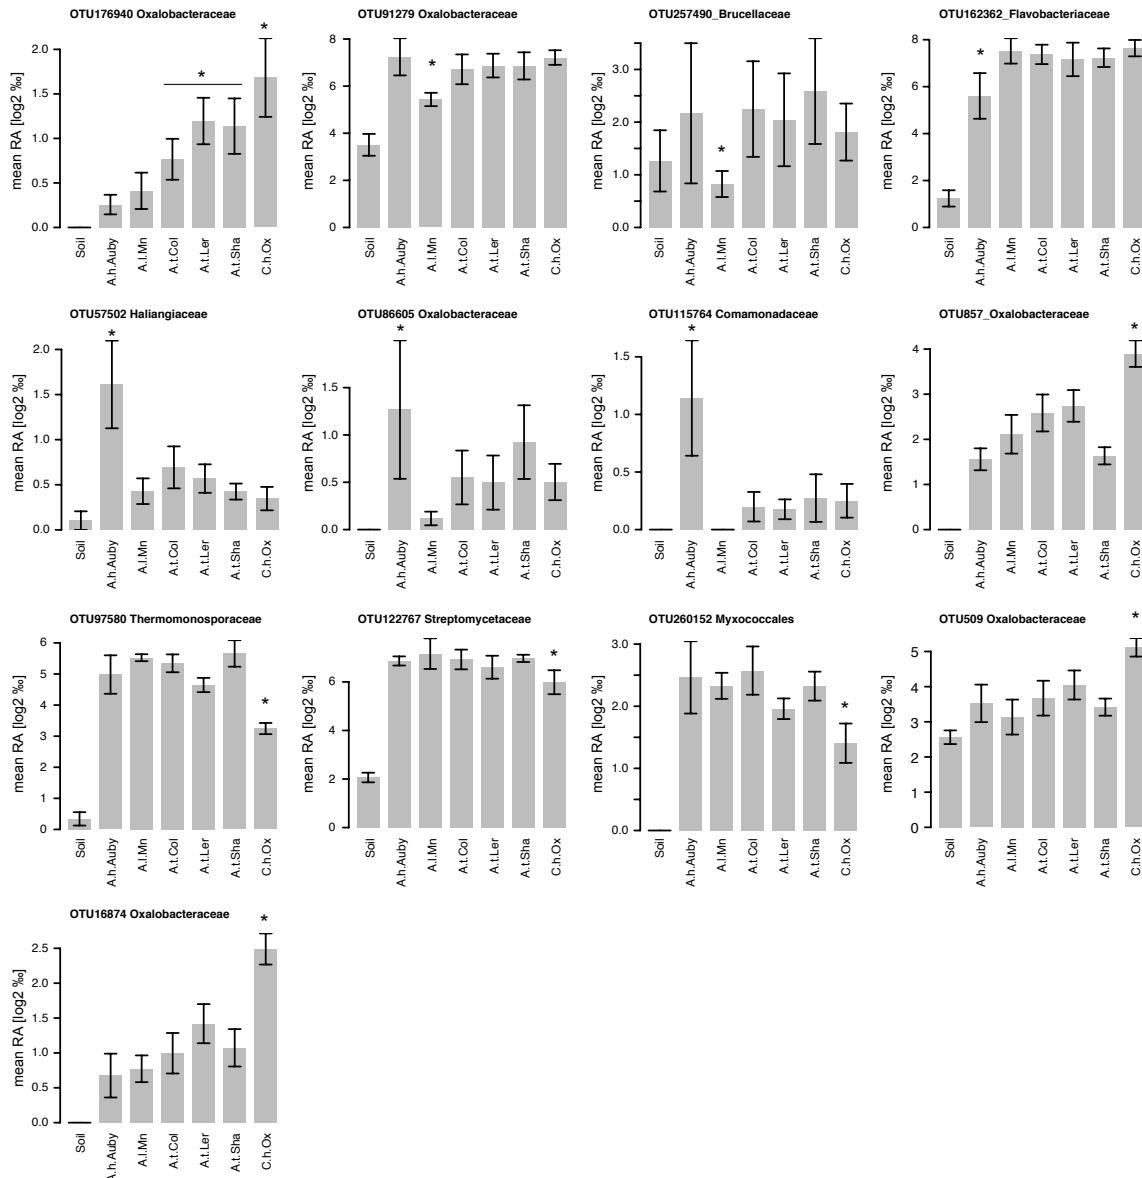

717

718 **Fig. S16. Species-specific accumulation of RootOTUs.** The 14 species-specific RootOTUs  
 719 of the greenhouse experiments were identified based on Tukey posthoc test for the variable  
 720 *species* ( $P < 0.1$  (FDR)). The statistic tests revealed that OTU176940 discriminated *A.*  
 721 *thaliana* and also *C. hirsuta* from the other species. The mean abundance of the species-  
 722 specific RootOTUs is depicted in soil and root samples of the indicated species. The  
 723 bargraphs report the variation ( $\pm$ s.e.m.) of the average log<sub>2</sub> abundance over both replicate  
 724 experiments. The asterisks are placed on the species as identified by the Tukey test. OTUs are  
 725 marked with OTU-ID, and taxonomic assignments at family rank.

726

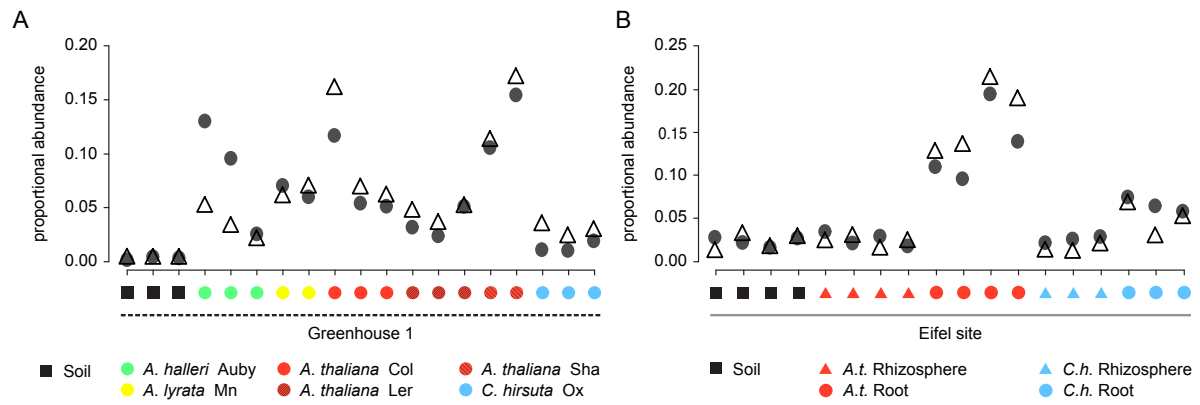

726

727 **Fig. S17. Validation of Thermomonosporaceae OTU accumulation by quantitative PCR.**

728 The DNA samples of the greenhouse experiment #1 (A) and the Eifel site (B) were used as  
 729 template for qPCR analysis of Thermomonosporaceae accumulation (open triangles). For the  
 730 pyrosequencing quantification (solid circles), the relative abundance values [%] of all OTUs  
 731 of the ACM assigned to the family Thermomonosporaceae were summed to obtain the  
 732 cumulative Thermomonosporaceae abundance per sample. These values were then  
 733 transformed to express the proportional abundances across all samples. The qPCR protocol  
 734 normalizes the abundance of Thermomonosporaceae amplicons with the abundance of a 16S  
 735 rDNA community amplicon. These normalized values were then also transformed to express  
 736 the proportional abundances across all samples. Overall correlation between 454 and qPCR  
 737 quantifications of Thermomonosporaceae abundance is 0.82 and 0.96 for the greenhouse  
 738 experiment #1 samples and the Eifel site samples, respectively.

739

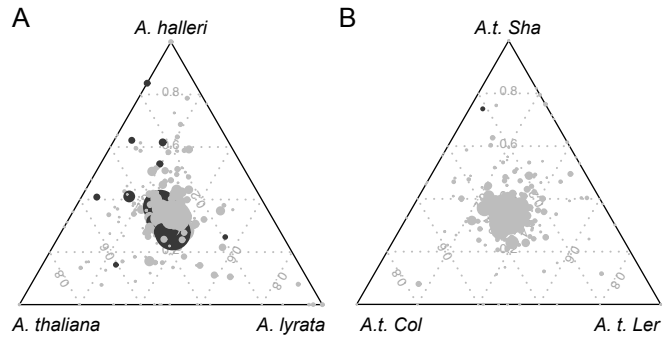

739

740 **Fig. S18. Increased inter- compared to intraspecies variation in Arabidopsis root**  
 741 **microbiota composition.** Ternary plots depict relative OTU occurrence of the ACM in root  
 742 communities of indicated Arabidopsis species (A) or *A. thaliana* ecotypes (B). Each circle  
 743 represents an OTU and the size of the circle is proportional to the OTU's abundance. The  
 744 black colored OTUs in (A) refer to the 13 RootOTUs that vary by *species* and (B) an OTU  
 745 that varies by the factor *genotype* (ANOVA,  $F < 0.1$  (FDR)).

746

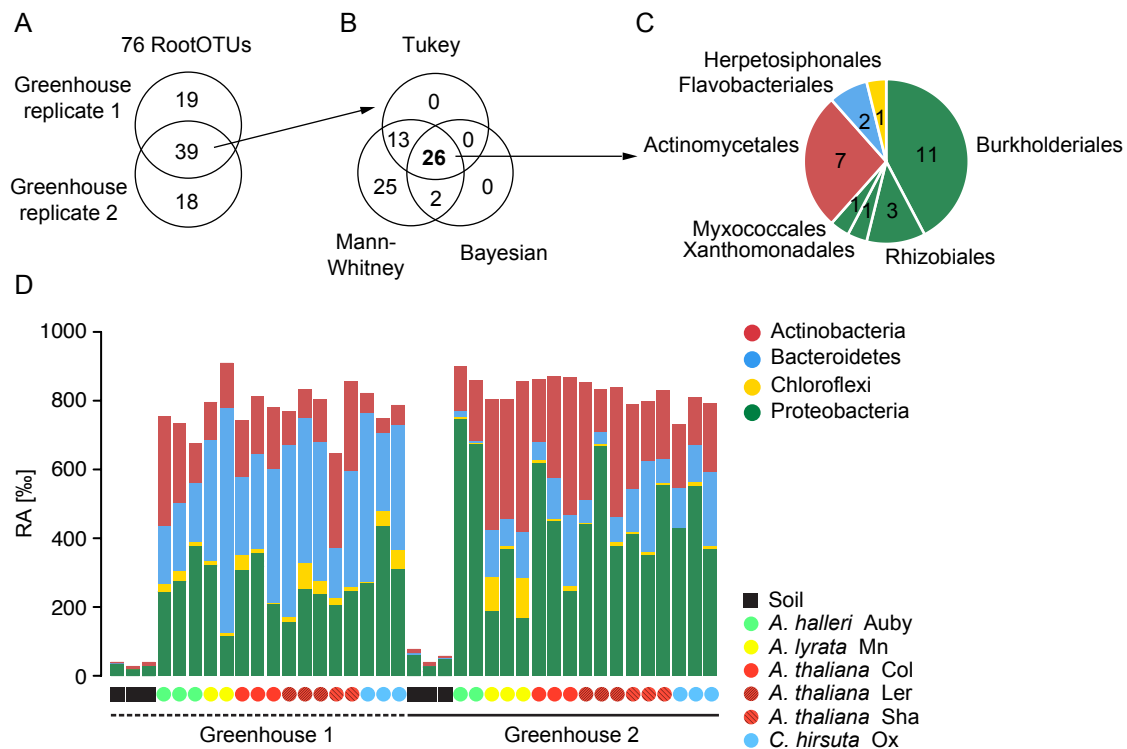

746

747 **Fig. S19. Identification of the shared RootOTUs from the greenhouse experiments. (A)**

748 The Venn diagram determines 39 shared RootOTUs from the 76 RootOTUs of all species in

749 the replicate experiments based on parametric statistics (Tukey,  $P < 0.1$  (FDR)). (B)

750 RootOTUs shared between the two replicates were identified with non-parametric Mann-

751 Whitney and Bayesian statistics and we defined the 'shared RootOTUs' from the validation

752 by the three different statistical methods. (C) The pie chart reports the taxonomic composition

753 of the 26 shared RootOTUs at the order rank. (D) Stacked relative abundance (RA) of the

754 shared RootOTUs of both greenhouse experiments. Each segment in the bar corresponds to

755 one of the 26 shared RootOTUs.

756

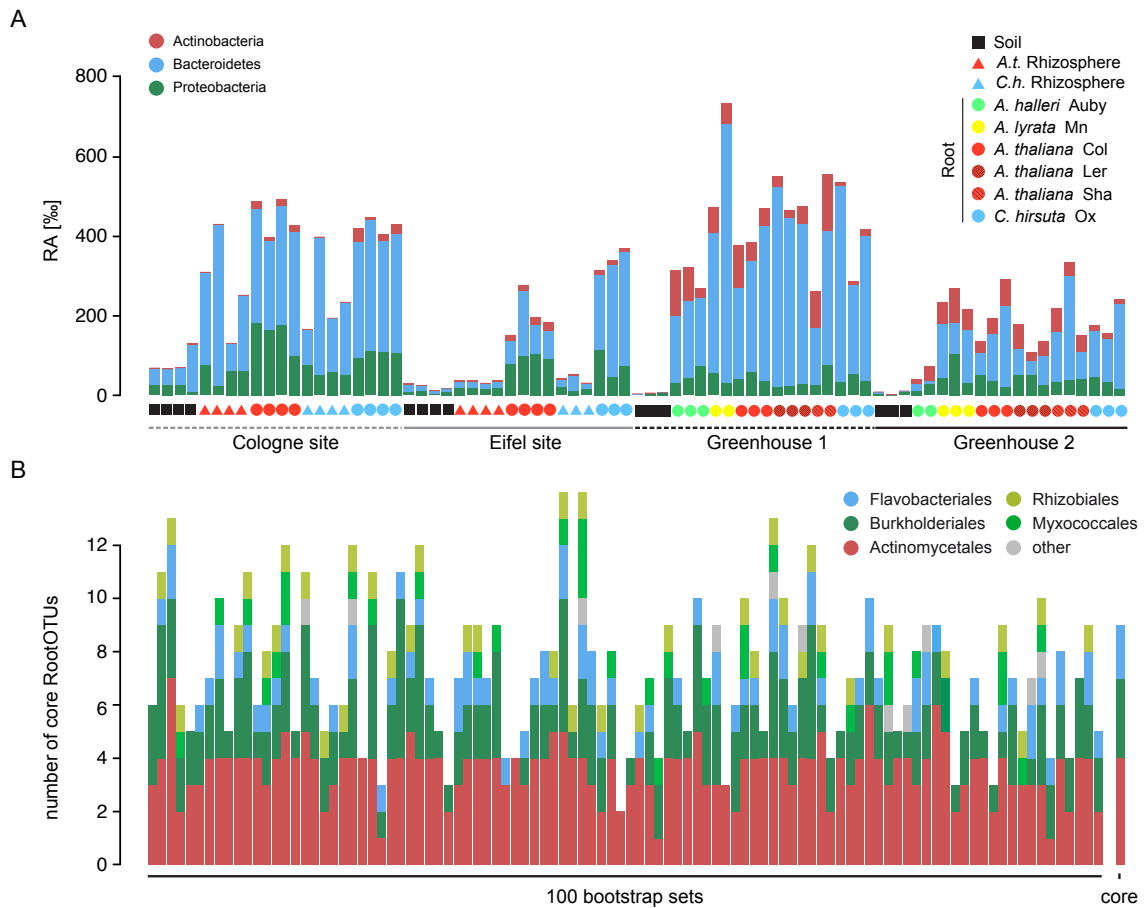

756

757 **Fig. S20. Core RootOTUs.** Stacked OTU abundance of the core RootOTUs identified  
 758 between that natural site and the replicate greenhouse experiments (A). Each segment in the  
 759 bar corresponds to an OTU color-coded by phylum. (B) Core RootOTUs detected in 100  
 760 bootstrap sets are plotted in stacked columns per bootstrap set and colored according to their  
 761 taxonomic assignment at the order rank. The column to the right (marked with 'core')  
 762 represents the triad core RootOTUs as identified for the original data set.

763



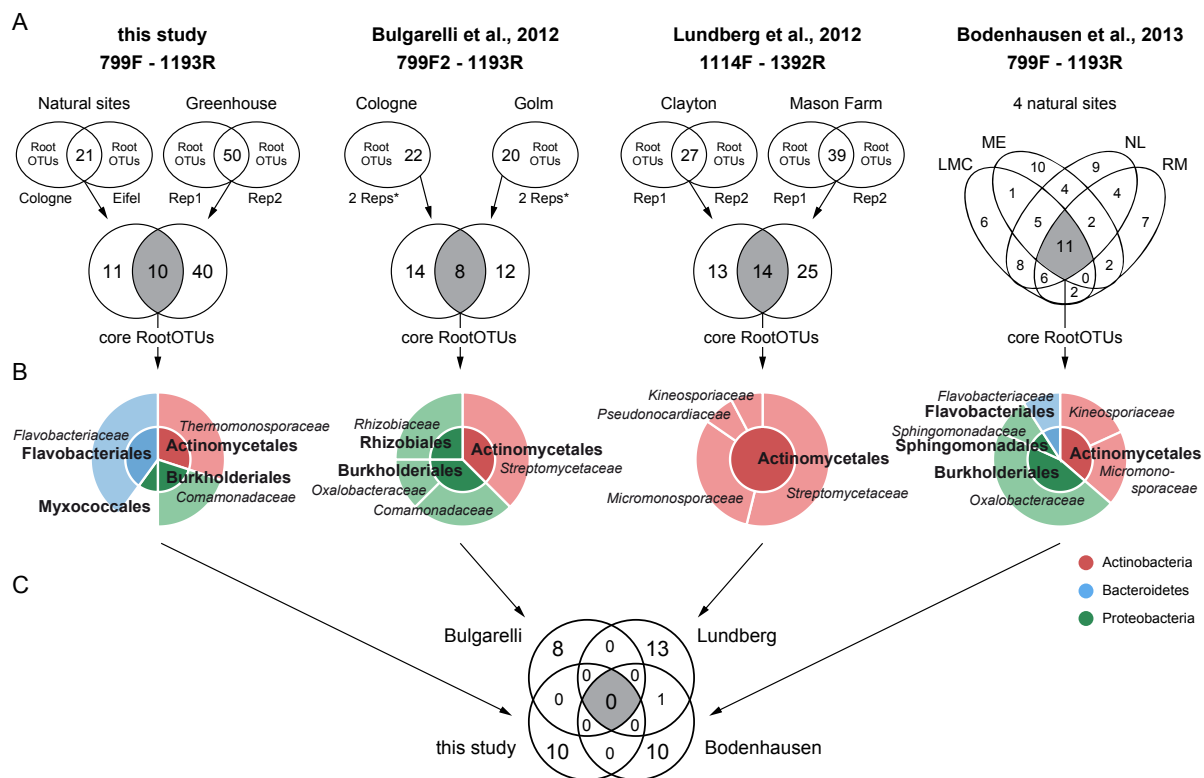

763

764 **Fig. S21: Core root microbiota comparison across studies.** Analysis of the core root  
 765 microbiota using the datasets from the Bulgarelli et al. (2012), Lundberg et al. (2012) and  
 766 Bodenhausen et al. (2013) studies and comparison the core RootOTUs of this study. These  
 767 studies have the examination of *A. thaliana* root endophyte communities across different soil  
 768 types and environments in common, but based on the following PCR primer combinations:  
 769 799F – 1193R (this study and reference 18), 799F2 – 1193R (3) and 1114F – 1392R (17).  
 770 Using QIIME, the sequences of the soil and root samples of these four studies were co-  
 771 clustered into OTUs at 97 % sequence similarity using the Greengenes reference dataset. For  
 772 each study, a corresponding OTU table was extracted and its core root microbiota was  
 773 determined. The common origin of the OTU table permits the direct comparison of OTU IDs  
 774 between studies. The bacterial community profiles of this study, the Bodenhausen, Bulgarelli  
 775 and Lundberg studies were covered by 6,000, 4,500, 1,000 and 1,000 sequences per sample,  
 776 respectively. For each study the ACM were defined and examined with the same statistic  
 777 analysis pipeline as used for the main analysis of this study. For each dataset, we followed the  
 778 same procedure to identify the core microbiota: (A) OTUs that are enriched in root compared  
 779 to soil samples (RootOTUs) were calculated within each replicate (Rep#) experiment, the  
 780 shared RootOTUs (number is given) between replicated experiments were determined and the  
 781 core defined from the overlap between soil types. Replicate samples of the Bulgarelli study  
 782 were combined (\*) within each soil type due to low sample number. We compared the root

783 endophyte communities of the Bodenhausen study since the same PCR primer combination  
784 was used. The root endophyte samples were collected from four natural sites in the US (Lake  
785 Michigan College, LMC; Michigan Extension, ME; North Liberty, NL and Route Marker,  
786 RM). (B) Taxonomic assignments of the core root OTUs are reported at the order (**bold**) and  
787 family (*italic*) ranks in the center and the outer ring of the pie charts, respectively. The  
788 segments of the pie charts are colored by the bacterial phyla of the corresponding OTU. No  
789 reliable taxonomy assignment at family rank was obtained for the Myxococcales OTU in the  
790 core root microbiota of this study. (C) The Venn diagram dissects the relative membership of  
791 core OTUs between the four tested studies.

792

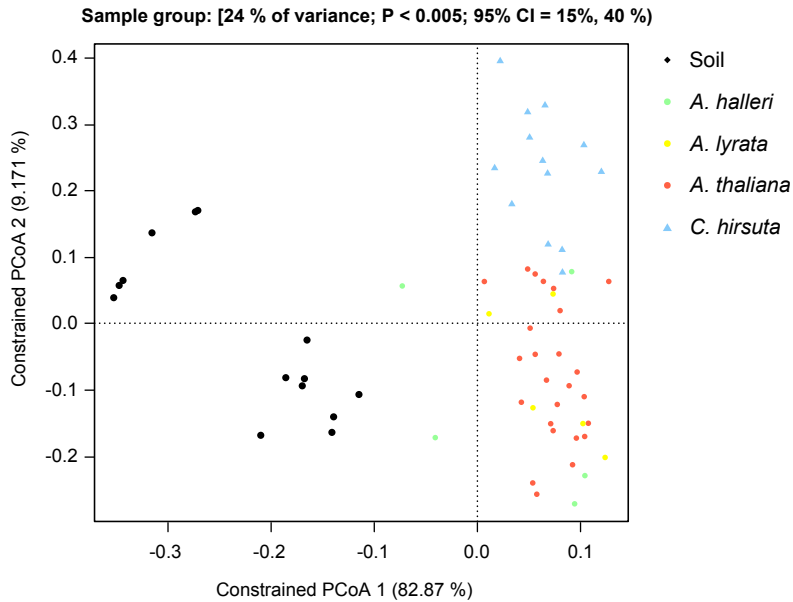

792

793 **Fig. S22. Sample scores of RootOTU communities based on Bray-Curtis distances.** The

794 RootOTU communities of soil and root samples both of the natural site and greenhouse

795 experiments were utilized for canonical analysis of principal coordinates, which was

796 constrained for *sample group*. Sample groups included all root samples by species and the soil

797 samples as additional group. The corresponding OTU scores and sample arrows are presented

798 in Fig. 5B.

799

799 **Table S1. Soil parameters.** Geochemical characterization of the natural experimental  
800 'Cologne soil' (CS) batches 'CS-4' and 'CS-5' and the soils from the natural sites. Soil  
801 parameters (A) and macronutrients (B).

**A**

| Experiment   | Soil    | <sup>1</sup> C. org. (%) | Clay (%) | Silt (%) | Sand (%) | pH   | <sup>2</sup> Classification |
|--------------|---------|--------------------------|----------|----------|----------|------|-----------------------------|
| Greenhouse   | CS-4    | 1.4                      | 13.4     | 37.3     | 49.3     | 6.95 | sandy loam                  |
| Greenhouse   | CS-5    | 4.0                      | 21.0     | 31.0     | 48.0     | 6.94 | Loam                        |
| Natural site | Cologne | 3.5                      | 21.0     | 31.0     | 48.0     | 6.98 | Loam                        |
| Natural site | Eifel   | 4.0                      | 16.0     | 31.0     | 53.0     | 6.14 | sandy loam                  |

802 <sup>1</sup> organic carbon

803 <sup>2</sup> Soil texture classification according FAO

804

**B**

| Experiment   | Soil    | Extract                       | <sup>3</sup> N | <sup>3</sup> P | <sup>3</sup> K | <sup>3</sup> Ca | <sup>3</sup> Mg |
|--------------|---------|-------------------------------|----------------|----------------|----------------|-----------------|-----------------|
| Greenhouse   | CS-4    | <sup>1</sup> H <sub>2</sub> O | 14.90          | 8.56           | 27.76          | 52.29           | 8.23            |
|              |         | <sup>2</sup> AAE              |                | 96.27          | 146.09         | 1572.70         | 118.40          |
| Greenhouse   | CS-5    | <sup>1</sup> H <sub>2</sub> O | 22.20          | 6.28           | 22.58          | 52.08           | 8.90            |
|              |         | <sup>2</sup> AAE              |                | 85.30          | 124.80         | 1604.10         | 118.50          |
| Natural site | Cologne | <sup>1</sup> H <sub>2</sub> O | 4.70           | 5.59           | 31.97          | 166.50          | 9.46            |
|              |         | <sup>2</sup> AAE              |                | 71.60          | 123.80         | 12021.50        | 224.60          |
| Natural site | Eifel   | <sup>1</sup> H <sub>2</sub> O | 1.50           | 9.28           | 43.09          | 56.08           | 26.34           |
|              |         | <sup>2</sup> AAE              |                | 17.70          | 178.00         | 2693.70         | 506.90          |

805 <sup>1</sup> determined with 1:10 (w/v) H<sub>2</sub>O extract as a proxy for plant-available nutrients

806 <sup>2</sup> determined with 1:10 (w/v) ammonium-acetate-EDTA (AAE) extract as a proxy for reserve-nutrients

807 <sup>3</sup> mg/kg

808

808 **Table S2. Touch-down PCR program.** Thermal cycling conditions utilized to generate  
809 barcoded amplicon libraries.

| <b>Step #</b> | <b>Temperature [°C]</b> | <b>Time [seconds]</b> | <b># of cycles</b> |
|---------------|-------------------------|-----------------------|--------------------|
| 1             | 94                      | 120                   |                    |
| 2             | 94                      | 30                    | 5x                 |
| 3             | 58                      | 60                    |                    |
| 4             | 72                      | 15                    |                    |
| 5             | 94                      | 30                    | 5x                 |
| 6             | 57                      | 60                    |                    |
| 7             | 72                      | 30                    |                    |
| 8             | 94                      | 30                    | 5x                 |
| 9             | 56                      | 60                    |                    |
| 10            | 72                      | 45                    |                    |
| 11            | 94                      | 30                    | 20x                |
| 12            | 55                      | 60                    |                    |
| 13            | 72                      | 60                    |                    |
| 14            | 72                      | 600                   |                    |
| 15            | 15                      | pause                 |                    |

810

810 **Table S3. Shapiro-Wilk analysis.** For each of the data subsets, which we have examined  
811 with ANOVA (Supporting information), we tested normal distribution of data points for each  
812 taxon/OTU using the Shapiro-Wilk test. All ANOVA tests are listed in the table with the  
813 corresponding Figure number in the manuscript and the experiments (sites/replicates) and  
814 sample types included in the analysis. For each test the analysis level and the number of  
815 taxa/OTUs per level that were examined are indicated. The results of the Shapiro-Wilk tests  
816 are given with number of taxa/OTUs per analysis level (also as percentage) for which the null  
817 hypothesis (data points are normally distributed) was not rejected.

| <b>Figure</b> | <b>Sites/ Replicates</b> | <b>Samples</b>              | <b>Analysis</b> | <b>Taxa/OTUs</b> | <b><sup>1</sup>SW</b> | <b>%</b>    |
|---------------|--------------------------|-----------------------------|-----------------|------------------|-----------------------|-------------|
| S8A           | both natural sites       | root                        | Phylum          | 9                | <b>3</b>              | <b>33.3</b> |
| S8B           | both natural sites       | root                        | Family          | 51               | <b>28</b>             | <b>54.9</b> |
| 3A            | Cologne site             | soil, root &<br>rhizosphere | OTUs            | *227             | <b>89</b>             | <b>39.2</b> |
| 3B            | Eifel site               | soil, root &<br>rhizosphere | OTUs            | *229             | <b>112</b>            | <b>48.9</b> |
| S11           | both natural sites       | root                        | RootOTUs        | 70               | <b>47</b>             | <b>67.1</b> |
| S13A          | both replicates          | root                        | Phylum          | *8               | <b>3</b>              | <b>37.5</b> |
| S13B          | both replicates          | root                        | Family          | *50              | <b>15</b>             | <b>30.0</b> |
| S19A          | replicate 1              | soil, root &<br>rhizosphere | OTUs            | *225             | <b>59</b>             | <b>26.2</b> |
| S19A          | replicate 2              | soil, root &<br>rhizosphere | OTUs            | *226             | <b>68</b>             | <b>30.1</b> |
| 4C            | both replicates          | root                        | RootOTUs        | 76               | <b>46</b>             | <b>60.5</b> |
| S18           | both replicates          | root (A.h.,<br>A.l. & A.t.) | OTUs            | *225             | <b>72</b>             | <b>32.0</b> |

818 <sup>1</sup>Shapiro-Wilk statistics: the number of taxa/OTUs with  $P > 0.05$  is reported

819 \*Note, not all of the 9 Phyla, 51 Families or 237 ACM OTUs were present in the individual data subsets

820

## 820 **Supplementary Dataset Legends**

821

822 **Dataset S1. Experimental design.** This excel file *Dataset\_S1.xlsx* contains for each sample  
823 the detailed experimental information about the type of experiment, replicate, type of sample,  
824 plant species and plant genotype. Further it contains sequencing related information such as  
825 library-ID, barcode sequences, number of generated raw sequences, number of quality  
826 sequences, number of quality sequences in the ACM data subset and the column  
827 *SRA\_filename* lists the name of the raw fasta file, as stored at the short read archive (SRA).

828

### 829 **Dataset S2. OTU table of the experiment 1 by regions.**

830 The excel document *Dataset\_S2.xlsx* documents the analysis of technical reproducibility of  
831 community profiles. The samples of the greenhouse replicate #1 (L28) were used for parallel  
832 sequencing and the resulting raw data was co-clustered using QIIME. A first work sheet  
833 includes the QIIME mapping file and the second work sheet contains the OTU table where  
834 plant-sequence-derived OTUs were removed.

835

### 836 **Dataset S3. OTU table of the ACM.**

837 The tab-delimited text file *Dataset\_S3.txt* contains the data matrix of the abundant community  
838 members (ACM). The data matrix contains OTU counts per sample, the Greengenes  
839 taxonomy and the OTU representative fasta sequences.

840

### 841 **Dataset S4. OTU table of the TICs.**

842 This tab-delimited text file *Dataset\_S4.txt* presents the data matrix of the threshold-  
843 independent community (TIC). This OTU table was rarefied at a sampling depth of 6,000  
844 sequences per sample and was utilized for OTU-based and beta diversity analyses. The data  
845 matrix contains OTU counts per sample, the Greengenes taxonomy and the OTU  
846 representative fasta sequences.

847

848

849 **Dataset S5. OTU table of the common sequencing library analysis.**

850 The tab-delimited text file *Dataset\_S5.txt* contains the data file used to examine the common  
851 sequencing library L40. The file contains the rarefied OTU table with a sampling depth of 530  
852 sequences per sample, which was the QIIME output utilized for beta-diversity analysis.

853

854 **Dataset S6. Summary table with the statistic test results.**

855 The excel file *Dataset\_S6.xlsx* contains the results of all statistic tests performed organized in  
856 separate worksheets. Worksheets are alphabetically indexed and the name of the worksheet  
857 contains the type of data (Phylum, Family, OTU, RootOTUs) analyzed and the statistical test  
858 (ANOVA, Tukey, Mann-Whitney (MW)) used. Natural site (NS) and greenhouse (GH)  
859 experiments are marked. The worksheet contains the model utilized for the analysis. BH:  
860 Benjamini and Hochberg method for adjusting  $P$  values for multiple hypothesis testing.

861

862 **Dataset S7. Design, rarefied OTU counts and taxonomy of data subsets from the *A.***  
863 ***thaliana* root microbiome comparison.** The excel document *Dataset\_S7.xlsx* contains a first  
864 worksheet with the detailed experimental information about the soil type, replicate number,  
865 type of sample, plant species and plant genotype for the soil and root samples from this study  
866 and the Bulgarelli et al. (2012), Lundberg et al. (2012) and Bodenhausen et al. (2013) studies.  
867 Additional worksheets contain the rarefied OTU tables for this study, the Bodenhausen, the  
868 Bulgarelli and the Lundberg studies with sampling depths of 6,000, 4,500, 1,000 and 1,000  
869 sequences per sample, respectively. Finally, a worksheet containing the corresponding  
870 Greengenes taxonomy assignments is provided. Note, the OTU representative fasta sequences  
871 can be retrieved from Dataset S10.

872

873 **Dataset S8. Raw OTU table.** The file *Dataset\_S8.biom* corresponds to the OTU table built  
874 using the clustered sequence/OTU information per sample and the corresponding Greengenes  
875 taxonomy assignments. Plant-sequence-derived OTUs were removed from this OTU table.  
876 The file *Dataset\_S8.biom* is available at our homepage together with the R scripts used for  
877 data analyses ([http://www.mpipz.mpg.de/R\\_scripts](http://www.mpipz.mpg.de/R_scripts)).

878



879 **Dataset S9. Raw OTU table from the *A. thaliana* root microbiome comparison.** The file  
880 *Dataset\_S9.biom* corresponds to the OTU table as resulted from the co-clustering of the  
881 sequences from this study with the sequences from Bulgarelli et al. (2012), Lundberg et al.  
882 (2012) and Bodenhausen et al. (2013). This common OTU table does not contain chimeric  
883 and plant-sequence-derived OTUs. The provided OTU taxonomies were obtained from the  
884 Greengenes database (release gg\_otus\_13\_05). The file *Dataset\_S9.biom* is available at our  
885 homepage together with the R scripts used for data analyses  
886 ([http://www.mpipz.mpg.de/R\\_scripts](http://www.mpipz.mpg.de/R_scripts)).

887

888 **Dataset S10. OTU representative sequences.** The file *Dataset\_S10.fasta* (“gzipped”)  
889 contains the OTU representative fasta sequences corresponding to the Dataset S9. The file  
890 *Dataset\_S10.fasta* is available at our homepage together with the R scripts used for data  
891 analyses ([http://www.mpipz.mpg.de/R\\_scripts](http://www.mpipz.mpg.de/R_scripts)).
